# Supplementary material for: 20-Nor-isopimarane cycloethers from the deep-sea sediment-derived fungus Aspergillus wentii SD-310
Source: Royal Society of Chemistry journal article supplement (doi:10.1039/c6ra17638k), 2016-01-01

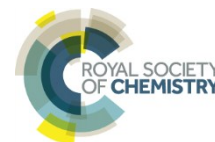

## Journal Name

### Supporting Information

## 20-Nor-isopimarane cycloethers from the deep-sea sediment-derived fungus *Aspergillus wentii* SD-310

Xin Li,<sup>ab</sup> Xiao-Ming Li,<sup>a</sup> Xiao-Dong Li,<sup>ab</sup> Gang-Ming Xu,<sup>a</sup> Yang Liu,<sup>ab</sup> and Bin-Gui Wang<sup>\*a</sup>

### Content

- Figure S1: HR-ESI-MS spectrum of compound **1**.
- Figure S2: <sup>1</sup>H NMR (500M, DMSO-*d*6) spectrum of compound **1**.
- Figure S3: <sup>13</sup>C NMR (125M, DMSO-*d*6) and DEPT spectra of compound **1**.
- Figure S4: <sup>1</sup>H-<sup>1</sup>H COSY spectrum of compound **1**.
- Figure S5: HSQC spectrum of compound **1**.
- Figure S6: HMBC spectrum of compound **1**.
- Figure S7: NOESY spectrum of compound **1**.
- Figure S8: HR-ESI-MS spectrum of compound **2**.
- Figure S9: <sup>1</sup>H NMR (500M, DMSO-*d*6) spectrum of compound **2**.
- Figure S10: <sup>13</sup>C NMR (125M, DMSO-*d*6) and DEPT spectra of compound **2**.
- Figure S11: <sup>1</sup>H-<sup>1</sup>H COSY spectrum of compound **2**.
- Figure S12: HSQC spectrum of compound **2**.
- Figure S13: HMBC spectrum of compound **2**.
- Figure S14: NOESY spectrum of compound **2**.
- Figure S15: HR-ESI-MS spectrum of compound **3**.
- Figure S16: <sup>1</sup>H NMR (500M, DMSO-*d*6) spectrum of compound **3**.
- Figure S17: <sup>13</sup>C NMR (125M, DMSO-*d*6) and DEPT spectra of compound **3**.
- Figure S18: <sup>1</sup>H-<sup>1</sup>H COSY spectrum of compound **3**.
- Figure S19: HSQC spectrum of compound **3**.
- Figure S20: HMBC spectrum of compound **3**.
- Figure S21: NOESY spectrum of compound **3**.
- Figure S22: HR-ESI-MS spectrum of compound **4**.
- Figure S23: <sup>1</sup>H NMR (500M, DMSO-*d*6) spectrum of compound **4**.
- Figure S24: <sup>13</sup>C NMR (125M, DMSO-*d*6) and DEPT spectra of compound **4**.
- Figure S25: <sup>1</sup>H-<sup>1</sup>H COSY spectrum of compound **4**.
- Figure S26: HSQC spectrum of compound **4**.
- Figure S27: HMBC spectrum of compound **4**.
- Figure S28: NOESY spectrum of compound **4**.
- Figure S29: HR-ESI-MS spectrum of compound **5**.
- Figure S30: <sup>1</sup>H NMR (500M, DMSO-*d*6) spectrum of compound **5**.
- Figure S31: <sup>13</sup>C NMR (125M, DMSO-*d*6) and DEPT spectra of compound **5**.
- Figure S32: <sup>1</sup>H-<sup>1</sup>H COSY spectrum of compound **5**.
- Figure S33: HSQC spectrum of compound **5**.
- Figure S34: HMBC spectrum of compound **5**.
- Figure S35: NOESY spectrum of compound **5**.

**Figure S1.** HR-ESI-MS spectrum of compound **1**.

2015417-SD310-36\_150415141717 #194 RT: 1.57 AV: 1 SB: 38 0.09-0.40 NL: 8.72E6  
T: FTMS + p ESI Full ms [100.00-2000.00]

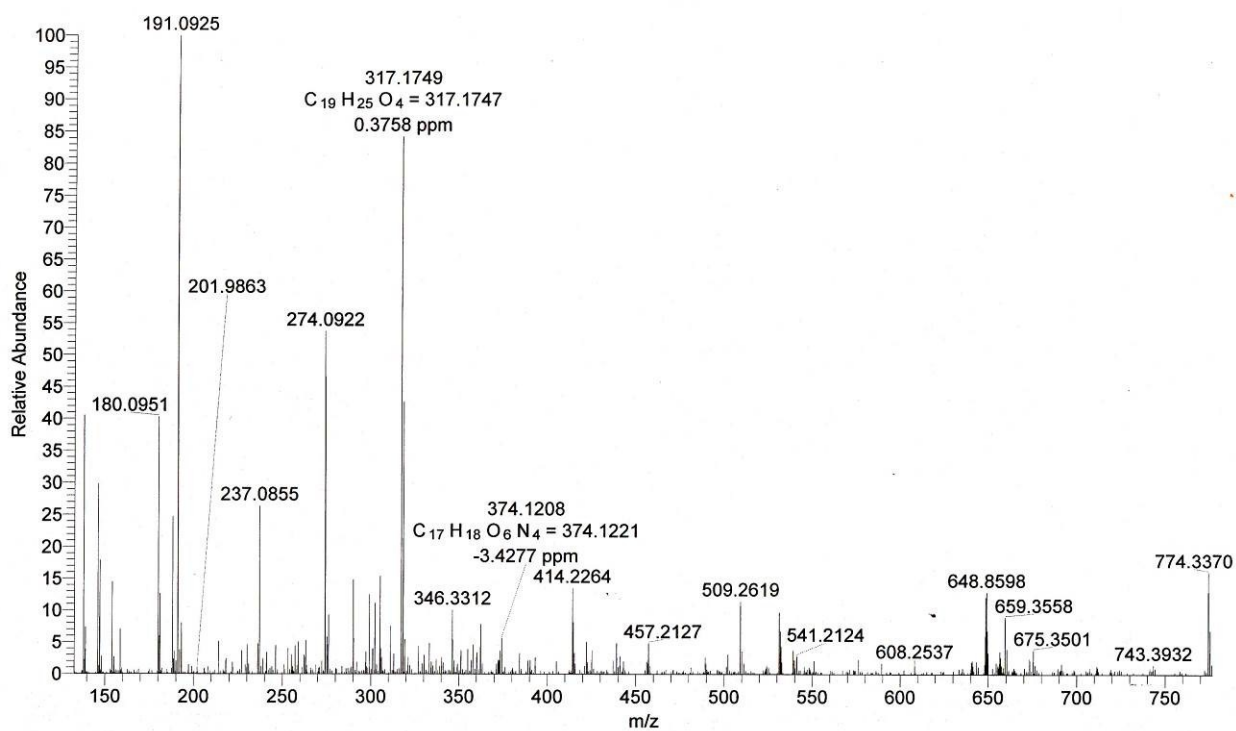**Figure S2.** <sup>1</sup>H NMR (500M, DMSO-*d*<sub>6</sub>) spectrum of compound **1**.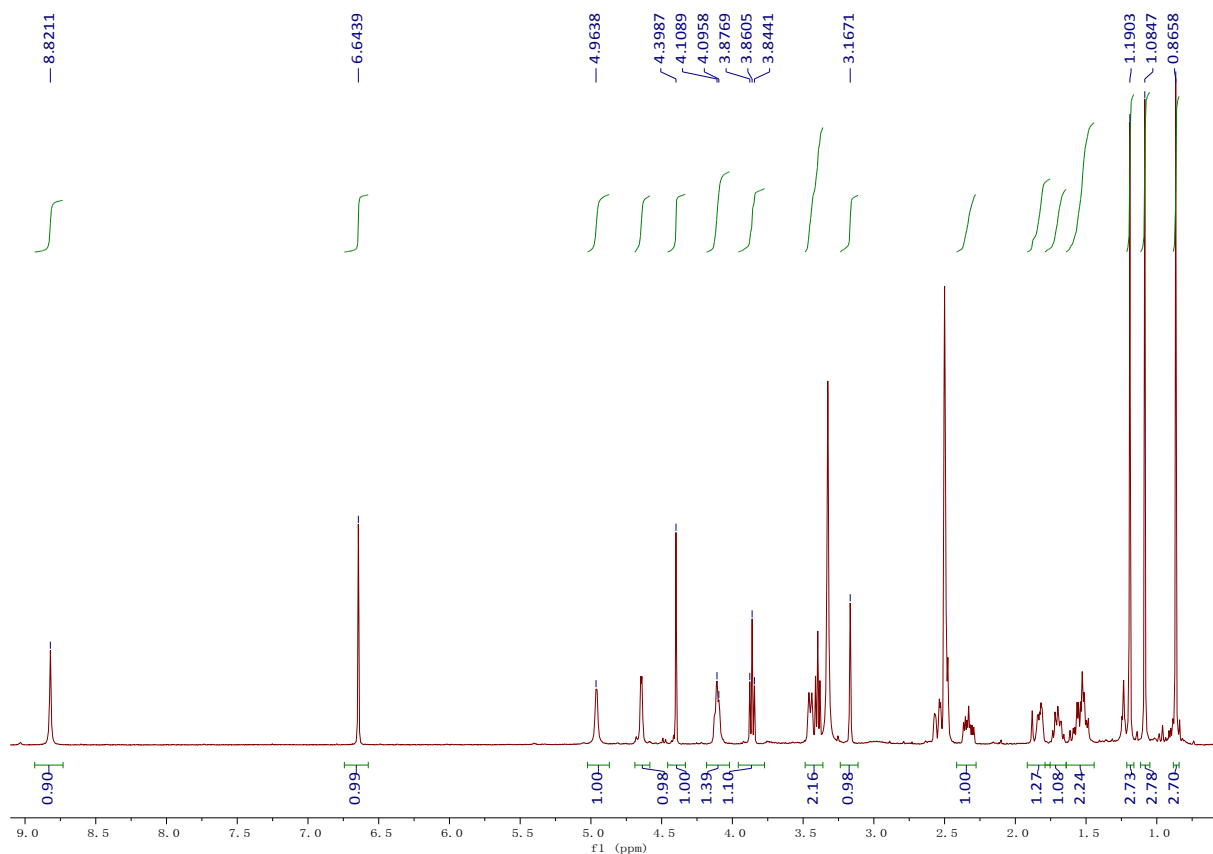

**Figure S3.**  $^{13}\text{C}$  NMR (125M, DMSO- $d_6$ ) and DEPT spectra of compound **1**.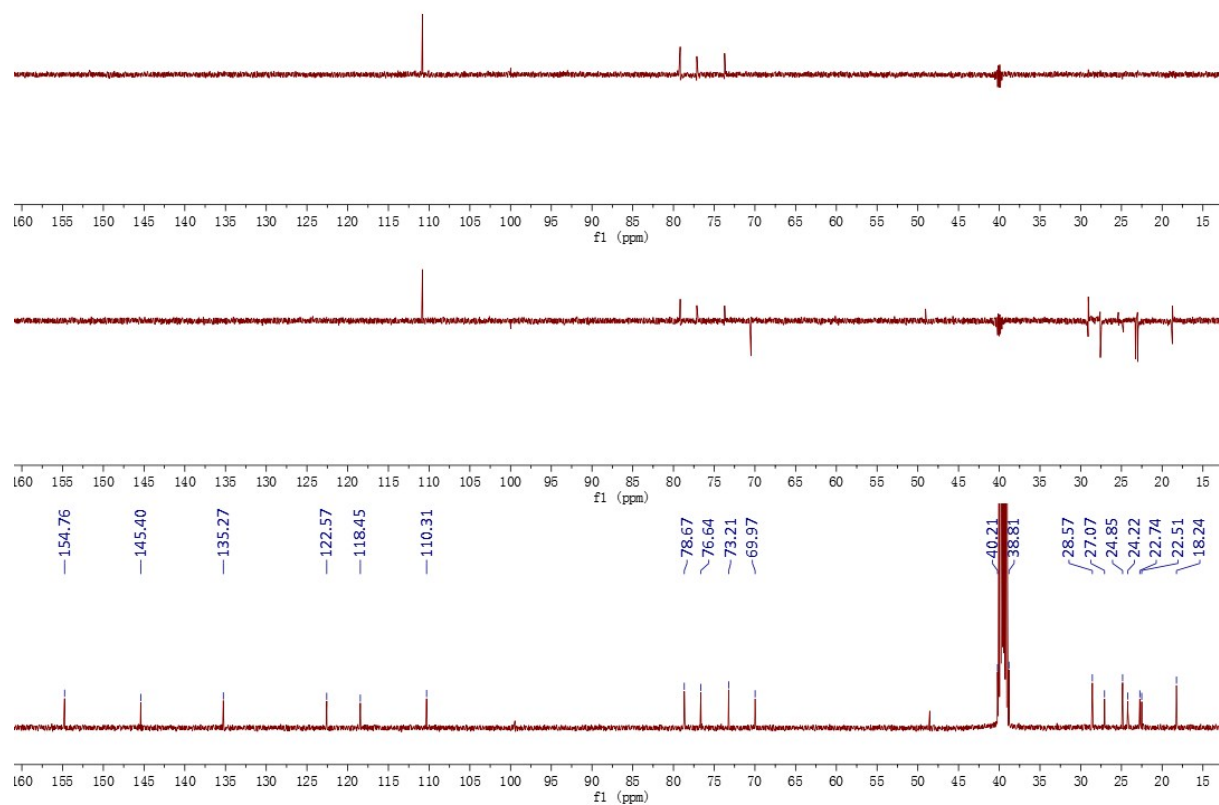**Figure S4.**  $^1\text{H}$ - $^1\text{H}$  COSY spectrum of compound **1**.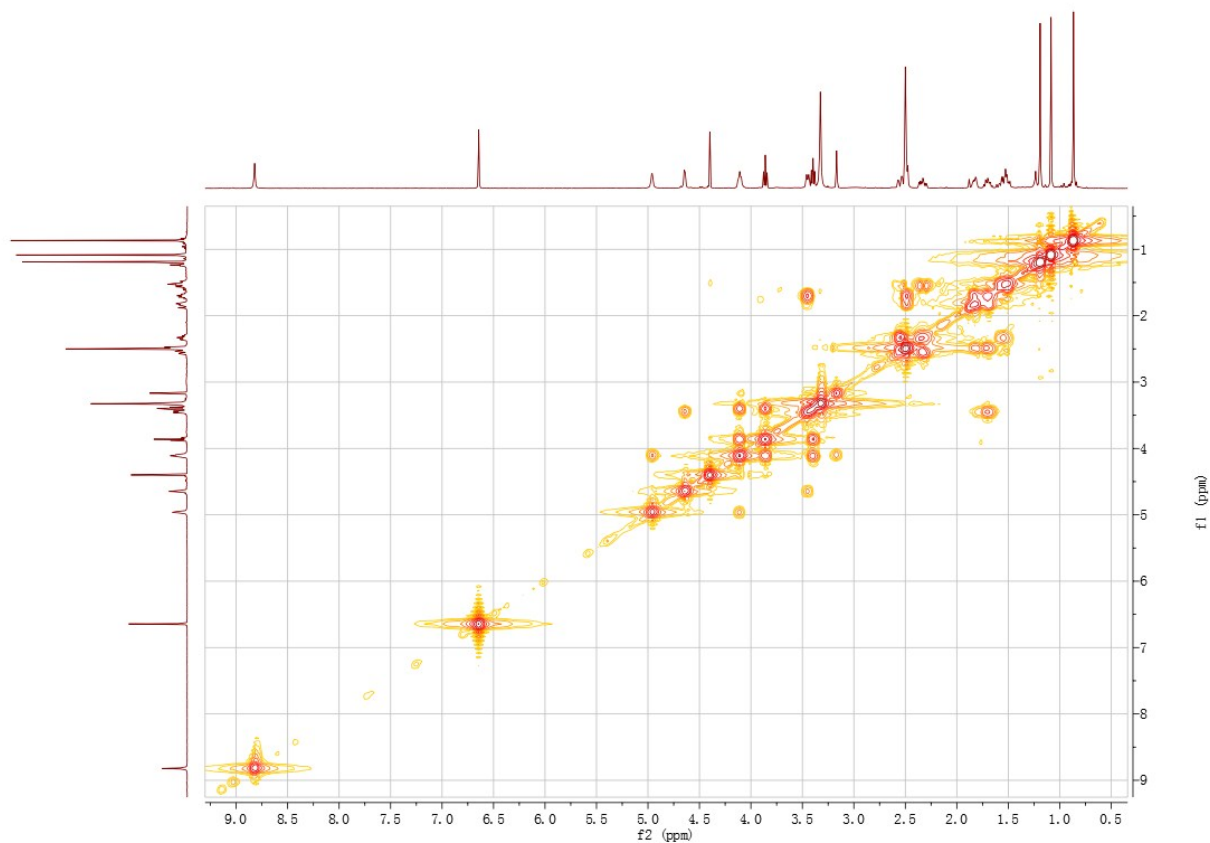

Figure S5. HSQC spectrum of compound 1.

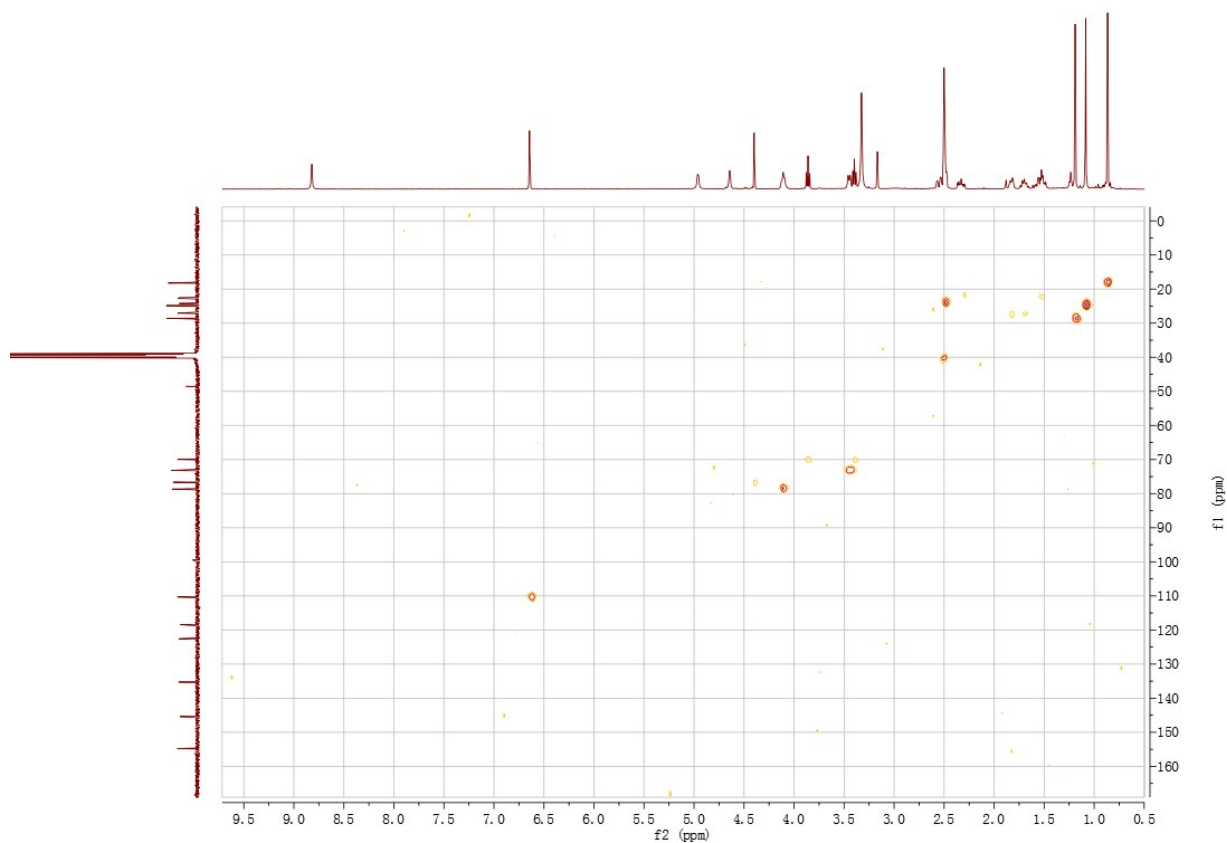

Figure S6. HMBC spectrum of compound 1.

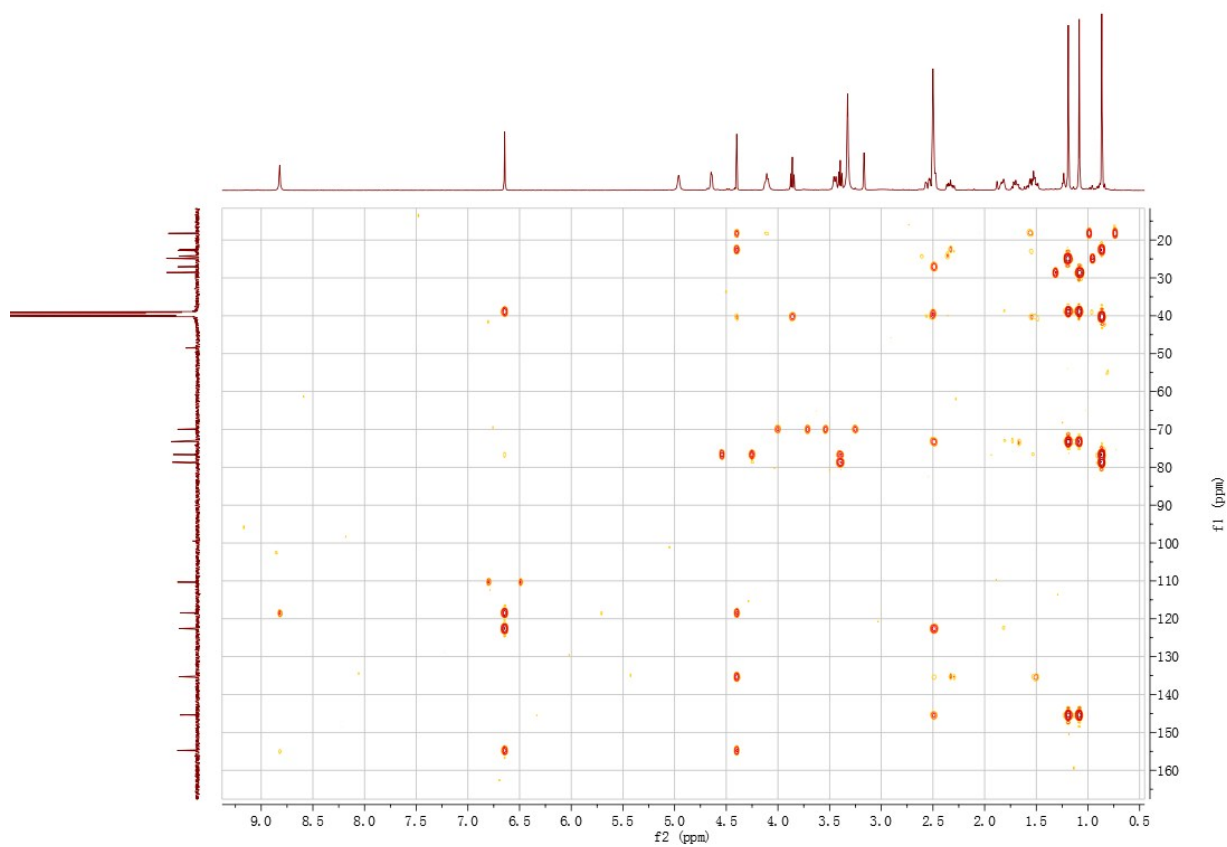

Figure S7. NOESY spectrum of compound 1.

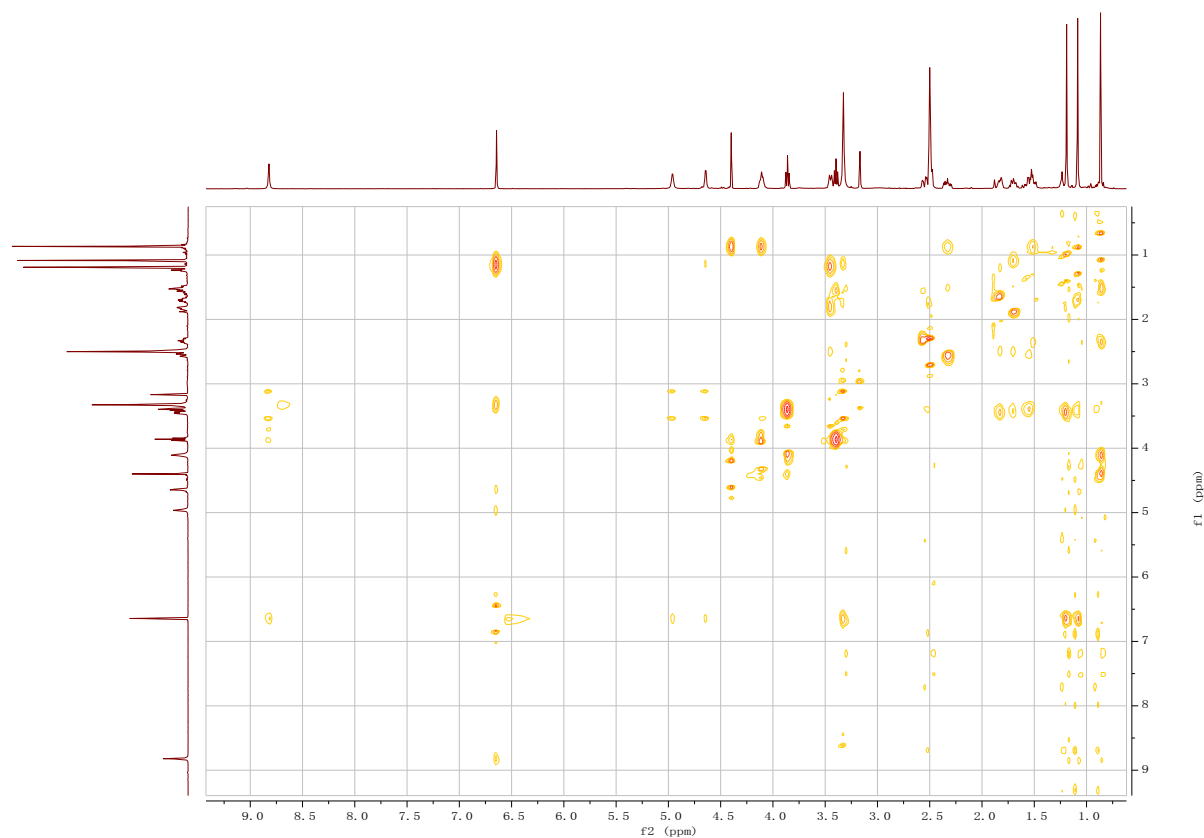

Figure S8. HR-ESI-MS spectrum of compound 2.

20150506-SD310-47\_150506095028 #204-209 RT: 1.63-1.67 AV: 6 NL: 3.23E6  
T: FTMS + p ESI Full ms [100.00-1000.00]

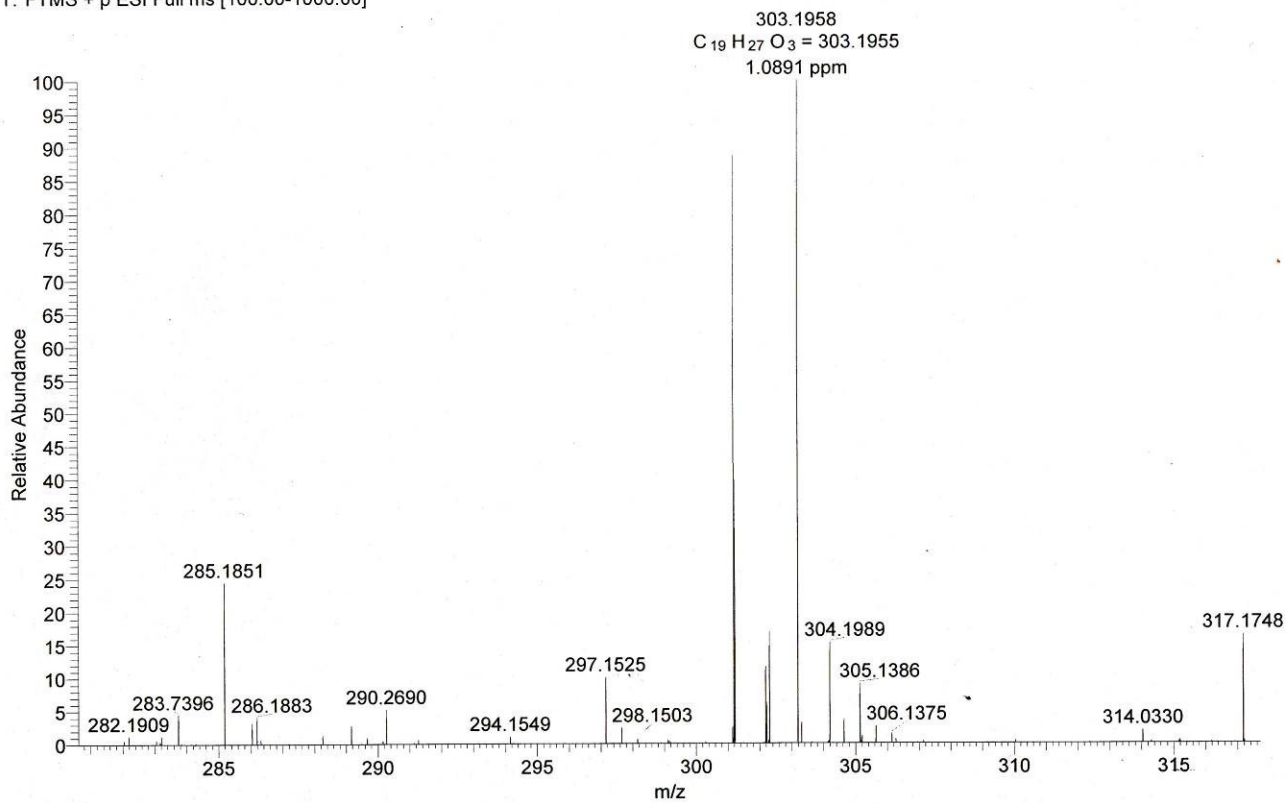

Figure S9.  $^1\text{H}$  NMR (500M,  $\text{DMSO-}d_6$ ) spectrum of compound 2.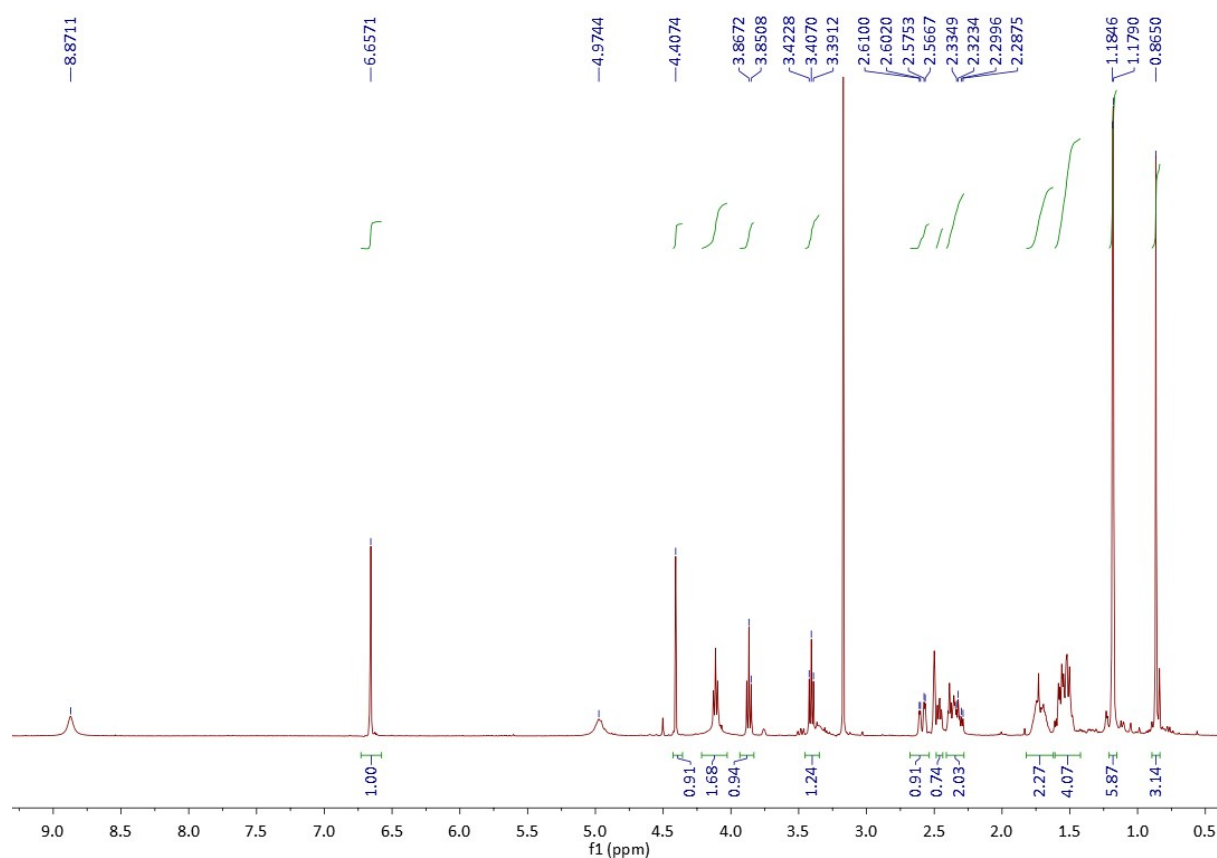Figure S10.  $^{13}\text{C}$  NMR (125M,  $\text{DMSO-}d_6$ ) and DEPT spectra of compound 2.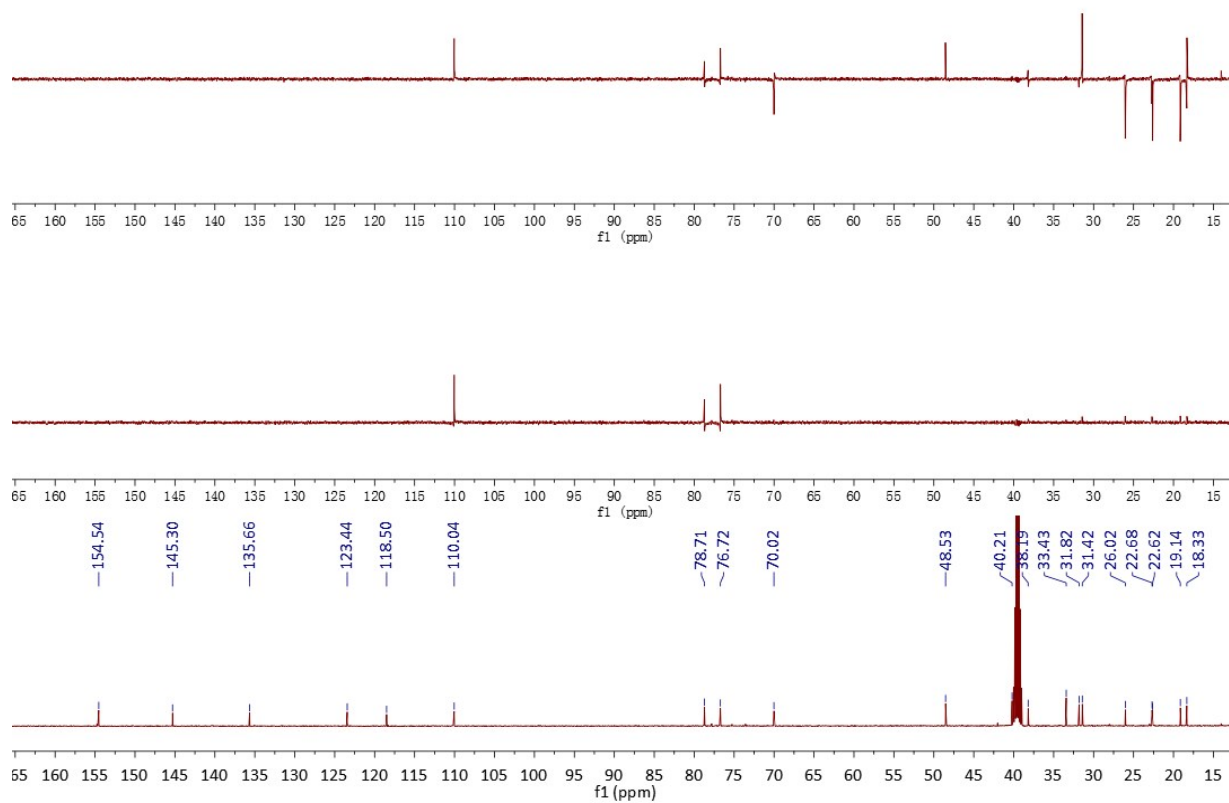

**Figure S11.**  $^1\text{H}$ - $^1\text{H}$  COSY spectrum of compound **2**.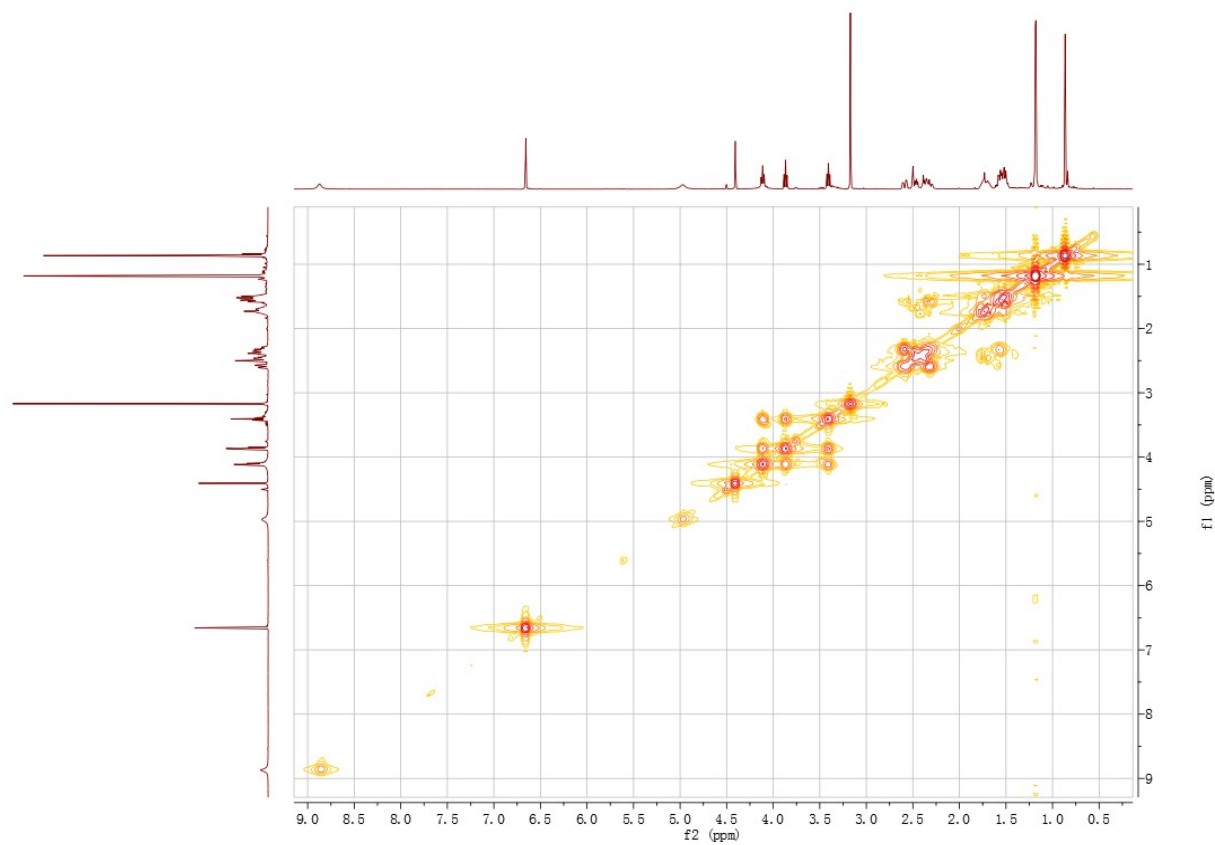**Figure S12.** HSQC spectrum of compound **2**.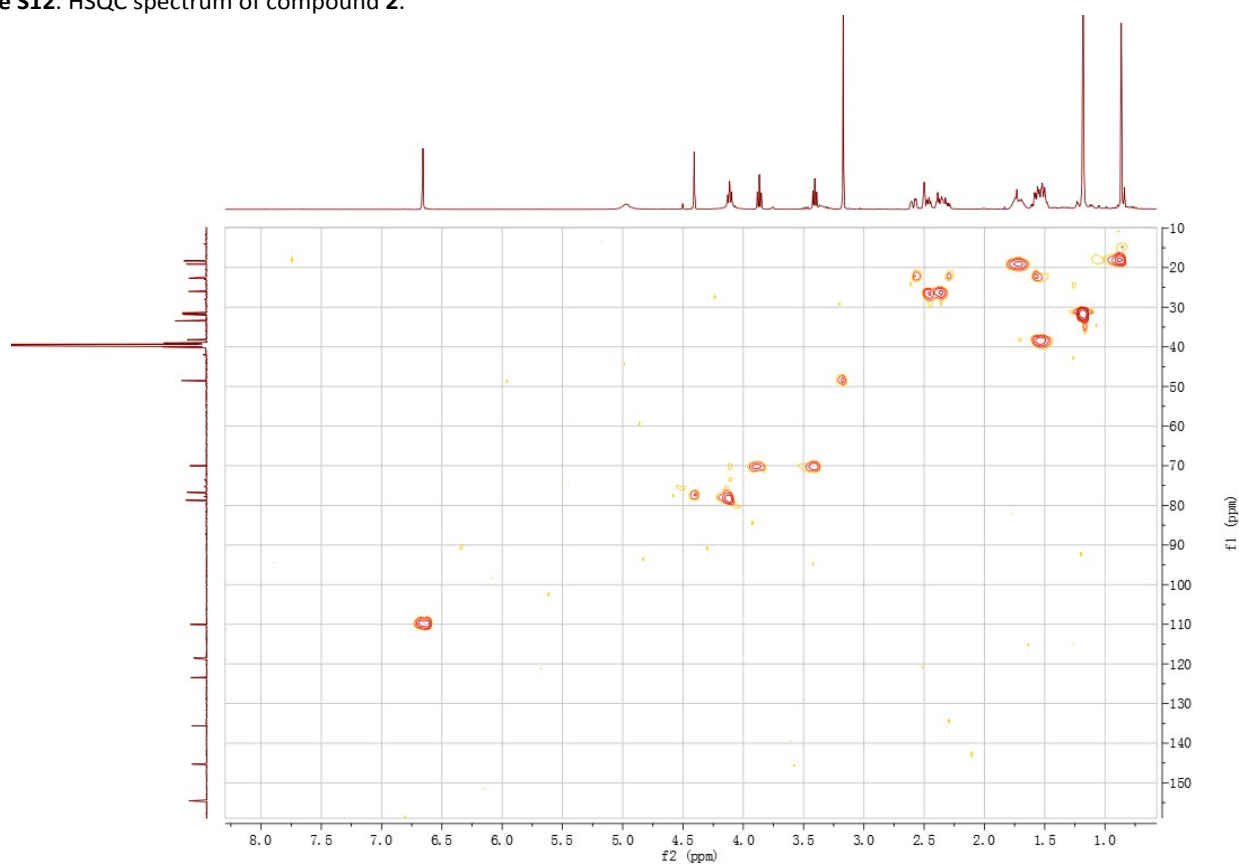

**Figure S13.** HMBC spectrum of compound **2**.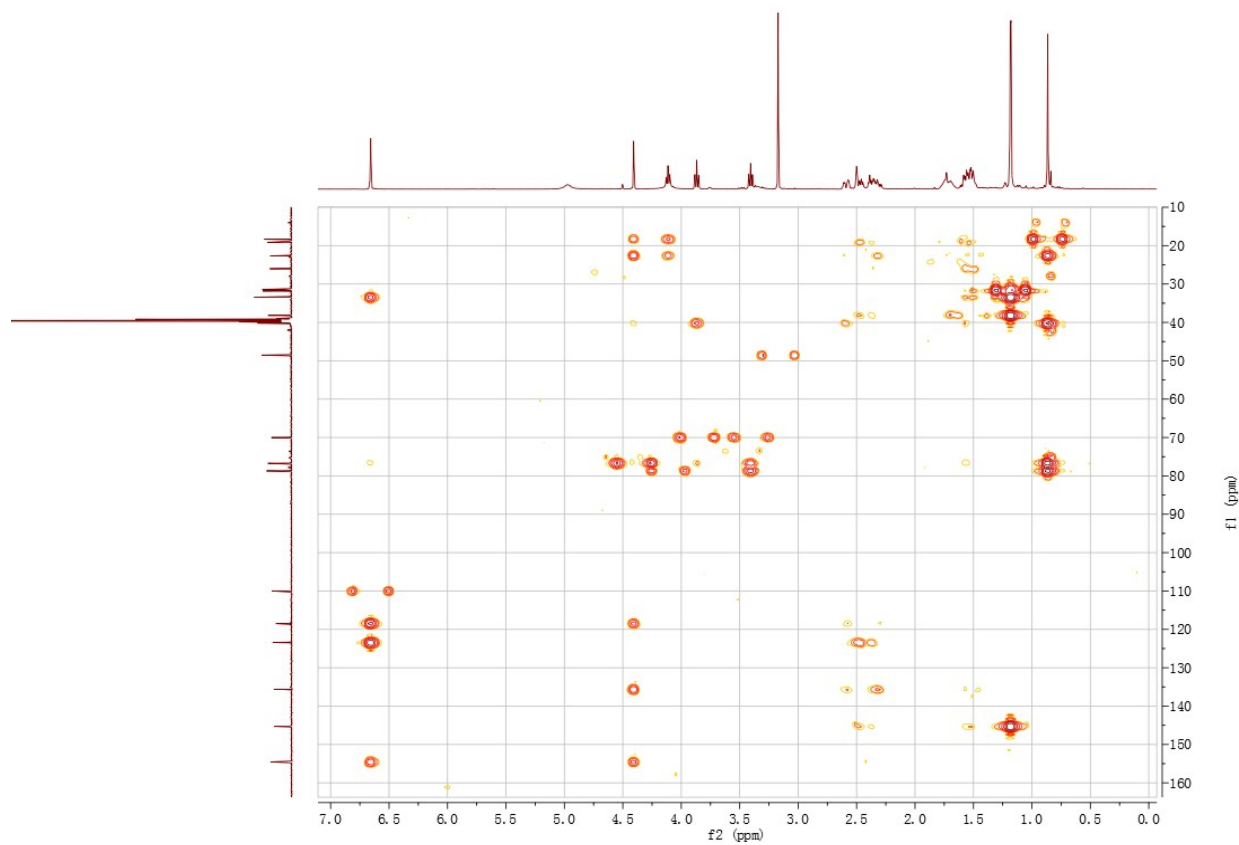**Figure S14.** NOESY spectrum of compound **2**.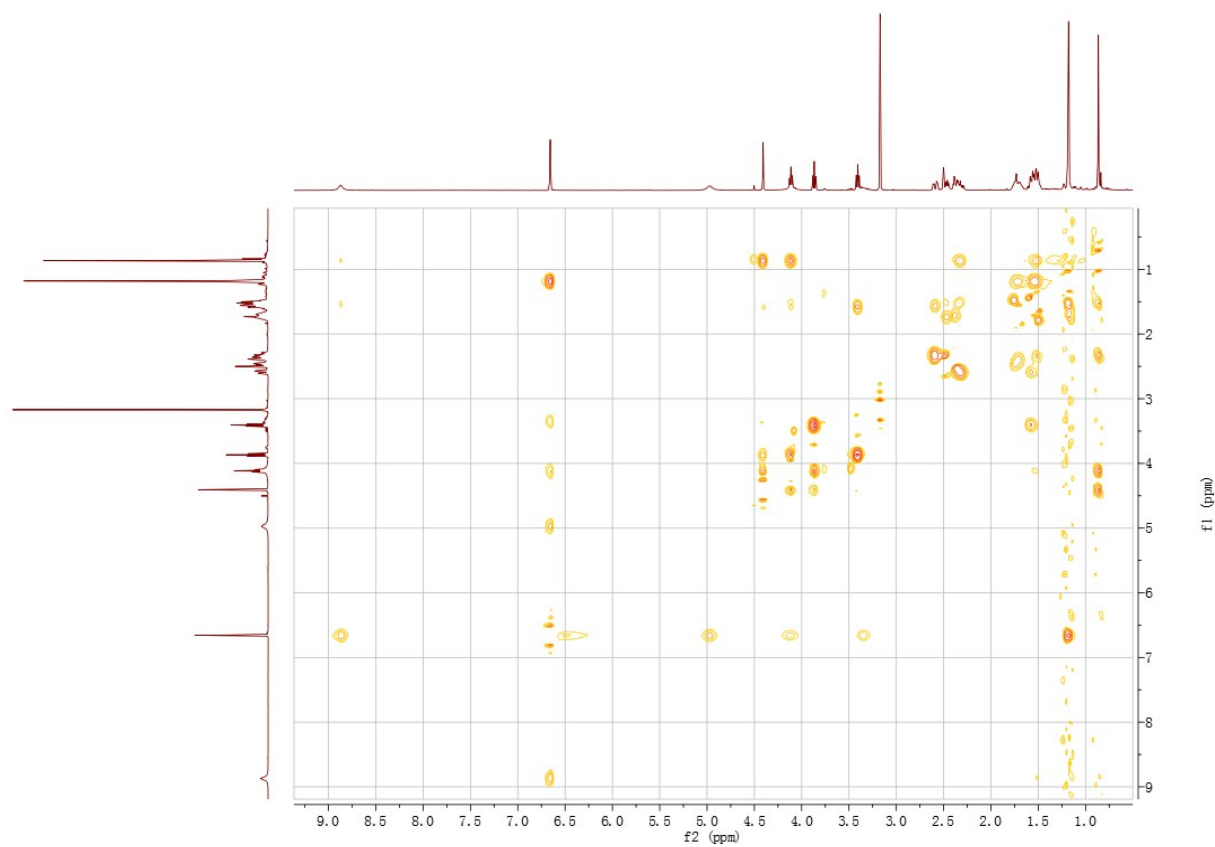



**Figure S15.** HR-ESI-MS spectrum of compound **3**.

2015417-SD310-35\_150417154443 #49-50 RT: 0.76-0.78 AV: 2 NL: 3.51E6  
T: FTMS - p ESI Full ms [120.00-2000.00]

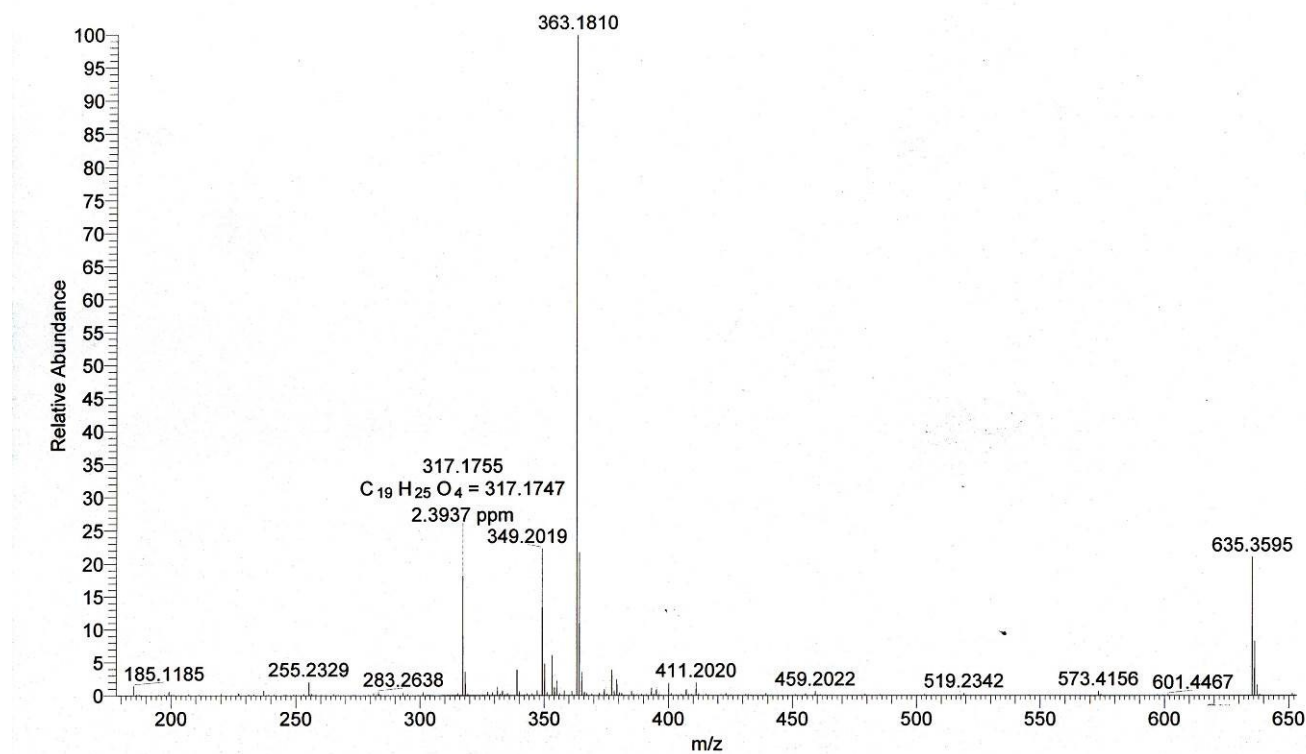**Figure S16.** <sup>1</sup>H NMR (500M, DMSO-*d*<sub>6</sub>) spectrum of compound **3**.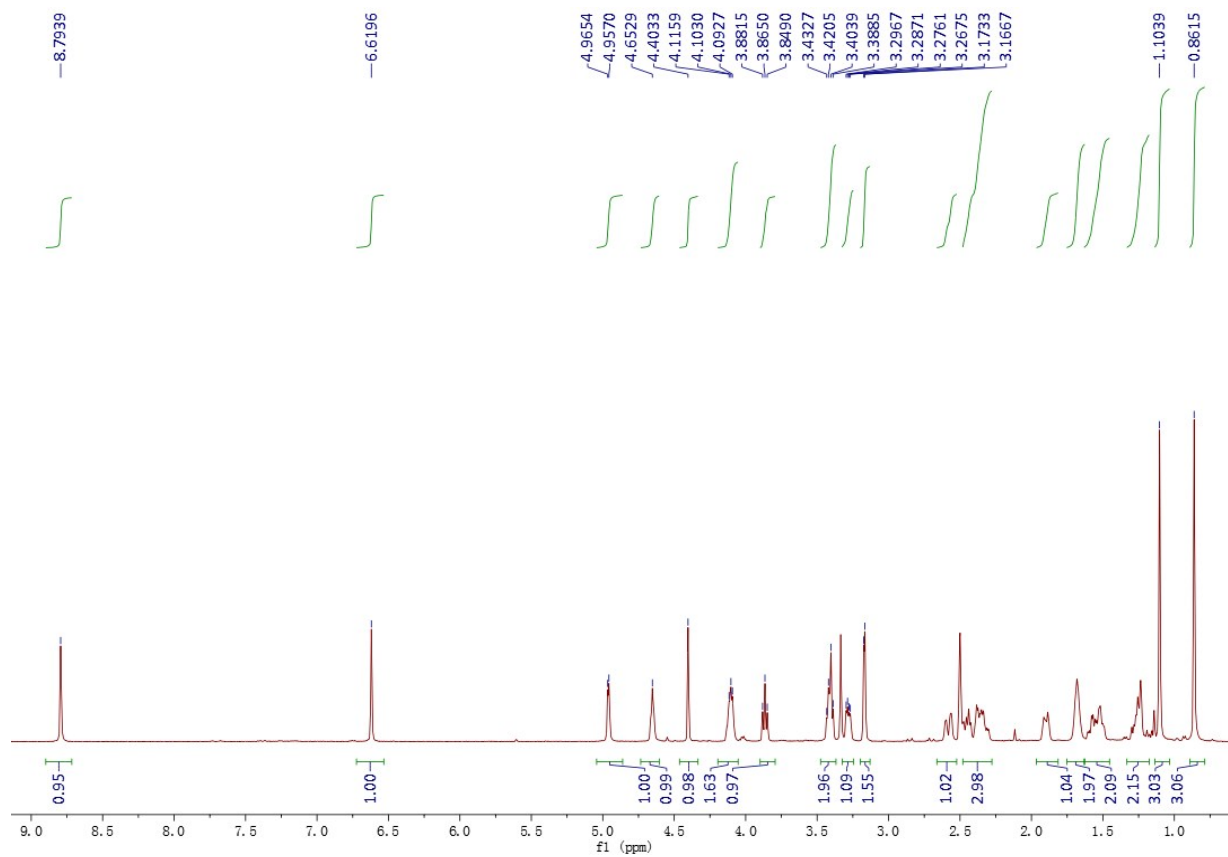

**Figure S17.**  $^{13}\text{C}$  NMR (125M,  $\text{DMSO-}d_6$ ) and DEPT spectra of compound **3**.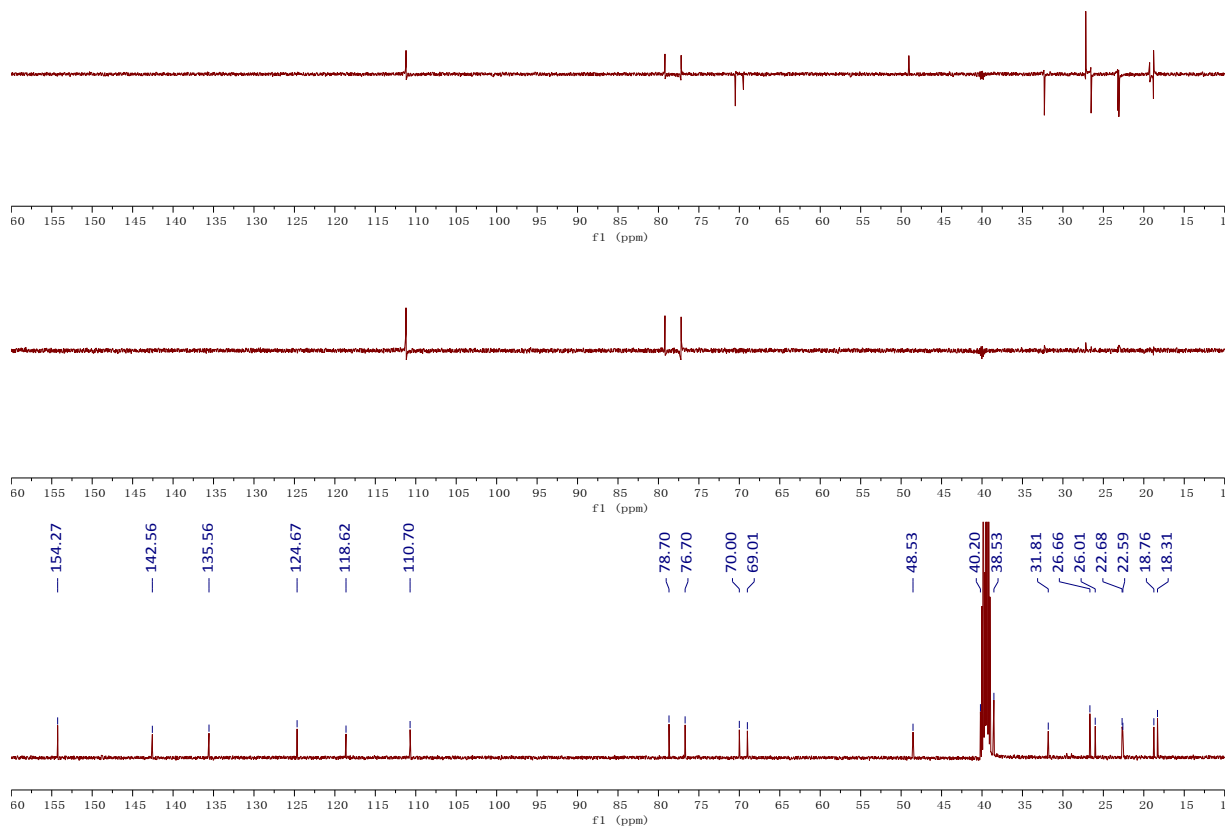**Figure S18.**  $^1\text{H}$ - $^1\text{H}$  COSY spectrum of compound **3**.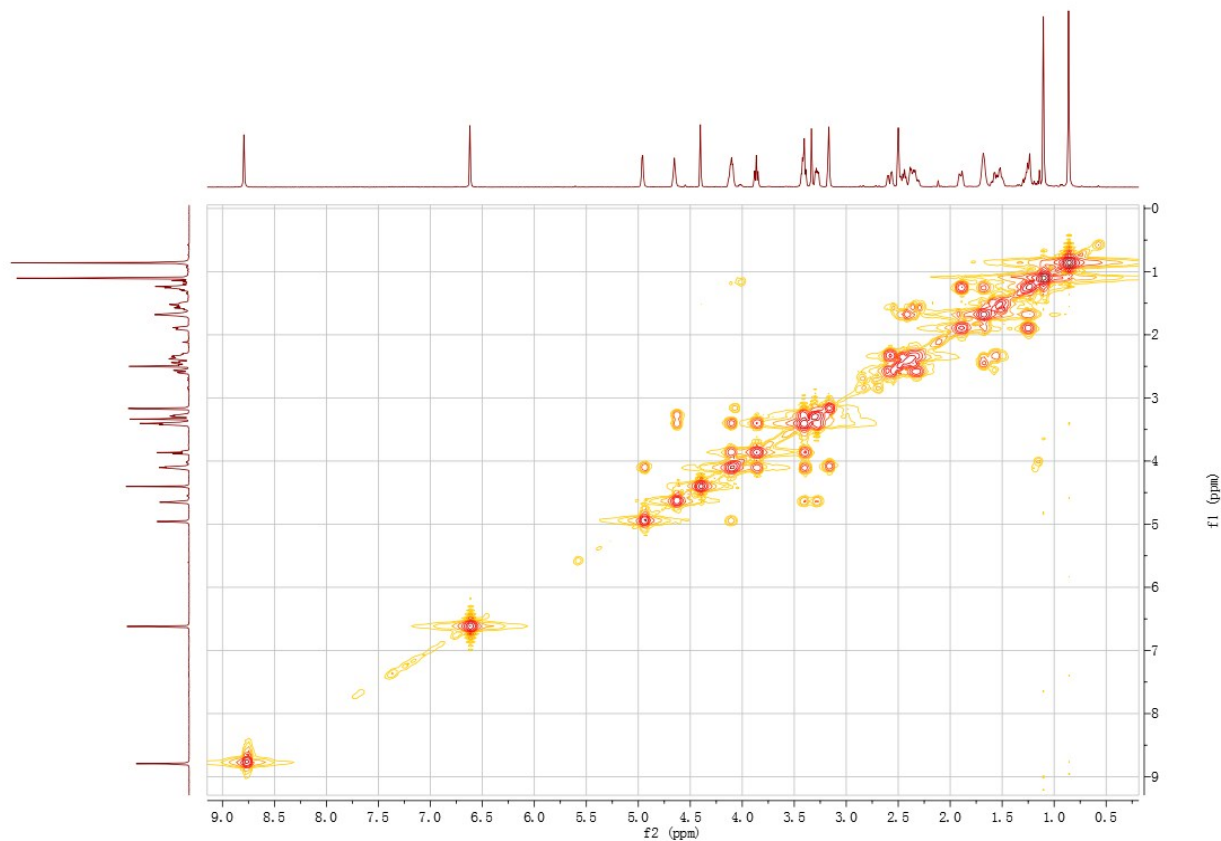

**Figure S19.** HSQC spectrum of compound **3**.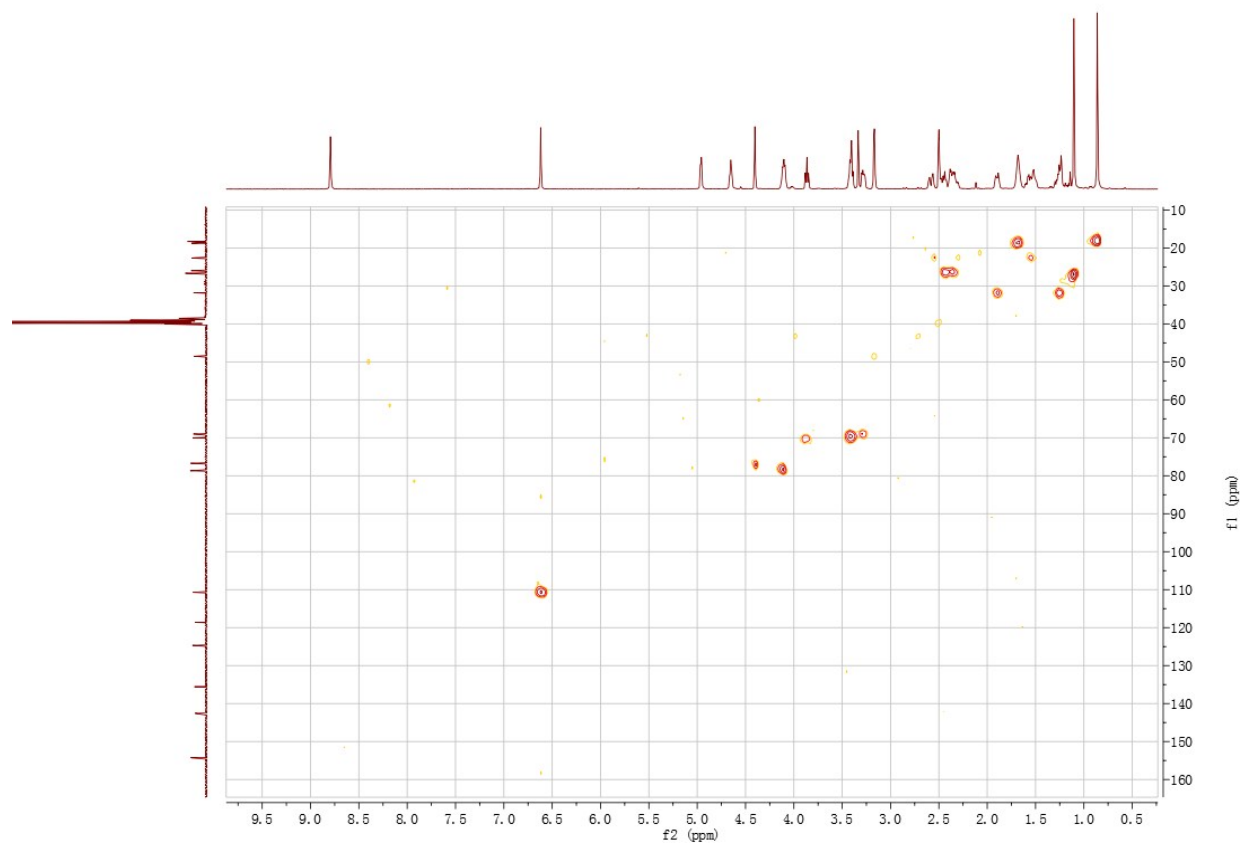**Figure S20.** HMBC spectrum of compound **3**.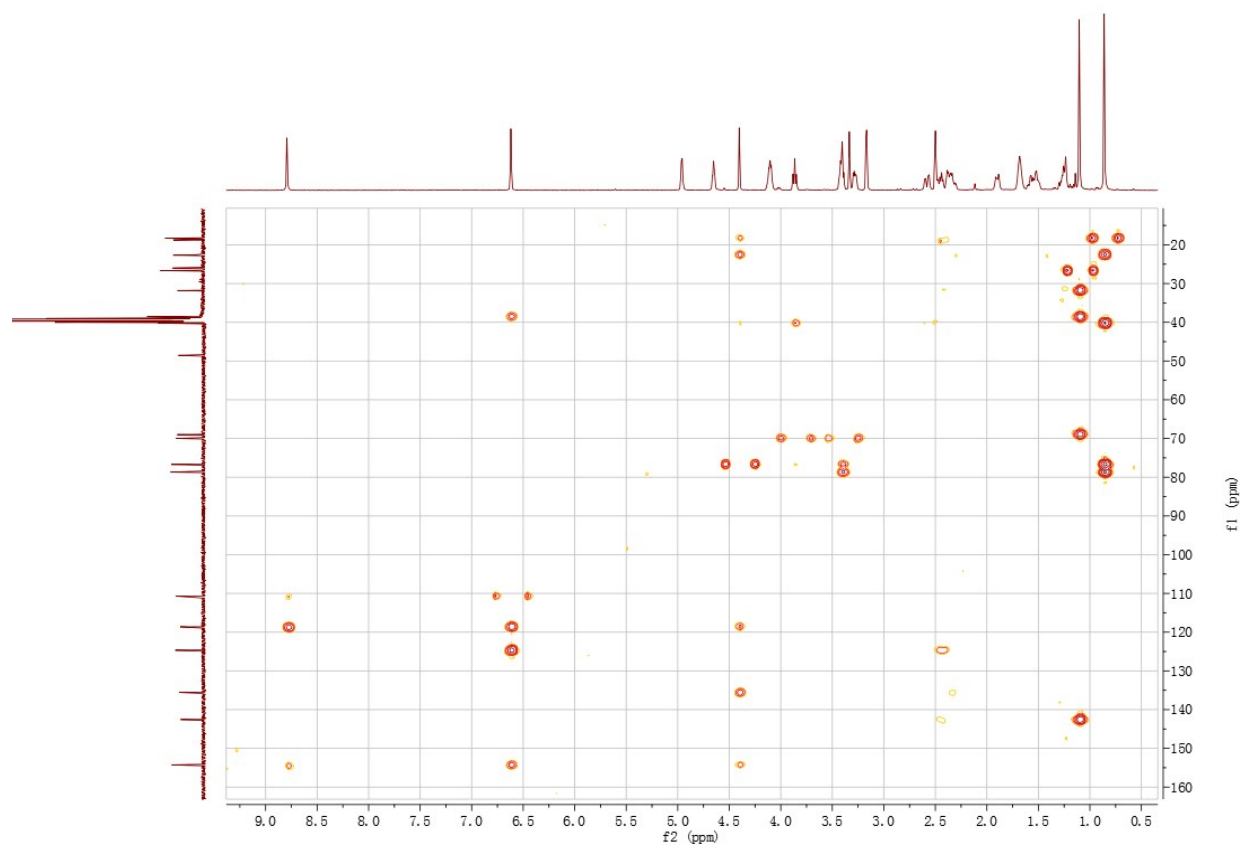

**Figure S21.** NOESY spectrum of compound **3**.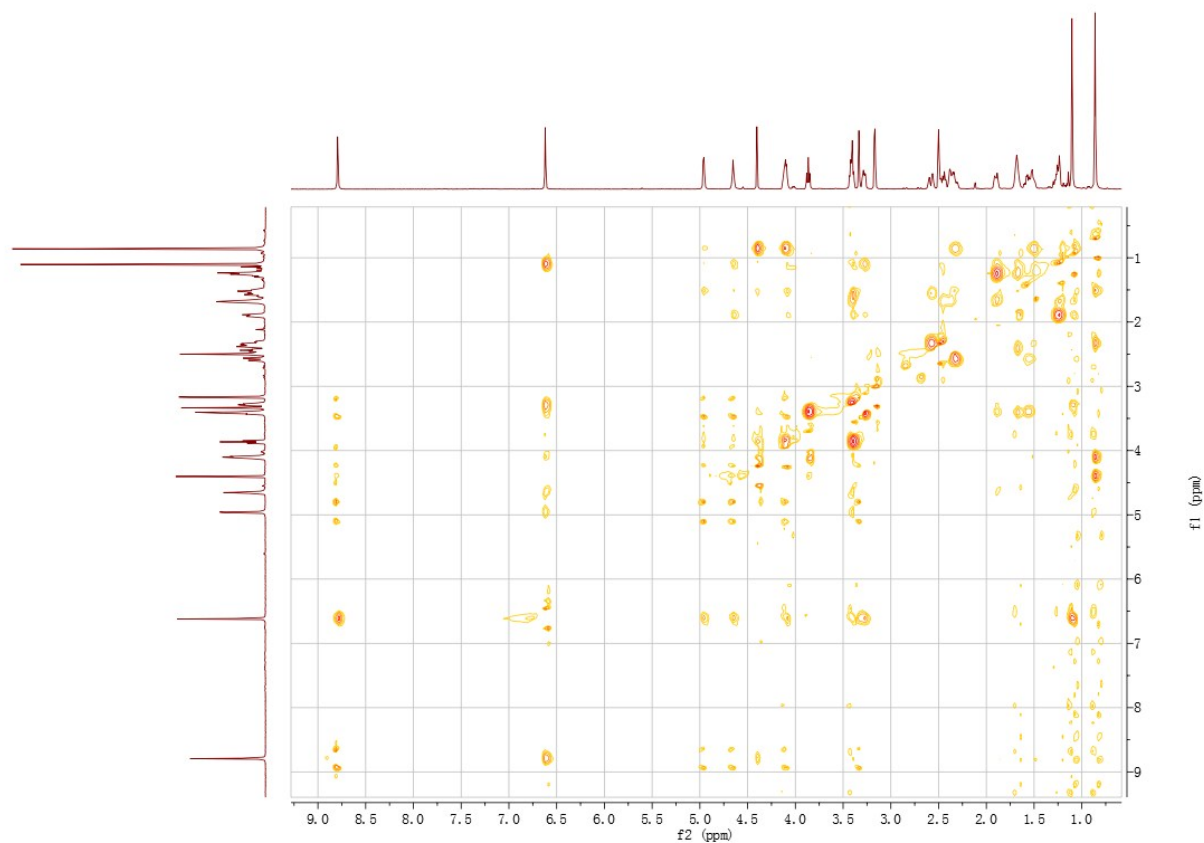**Figure S22.** HR-ESI-MS spectrum of compound **4**.

20151124-SD310-71\_151124144304 #42-43 RT: 1.15-1.18 AV: 2 NL: 1.19E7  
T: FTMS + p ESI Full ms [100.00-2000.00]

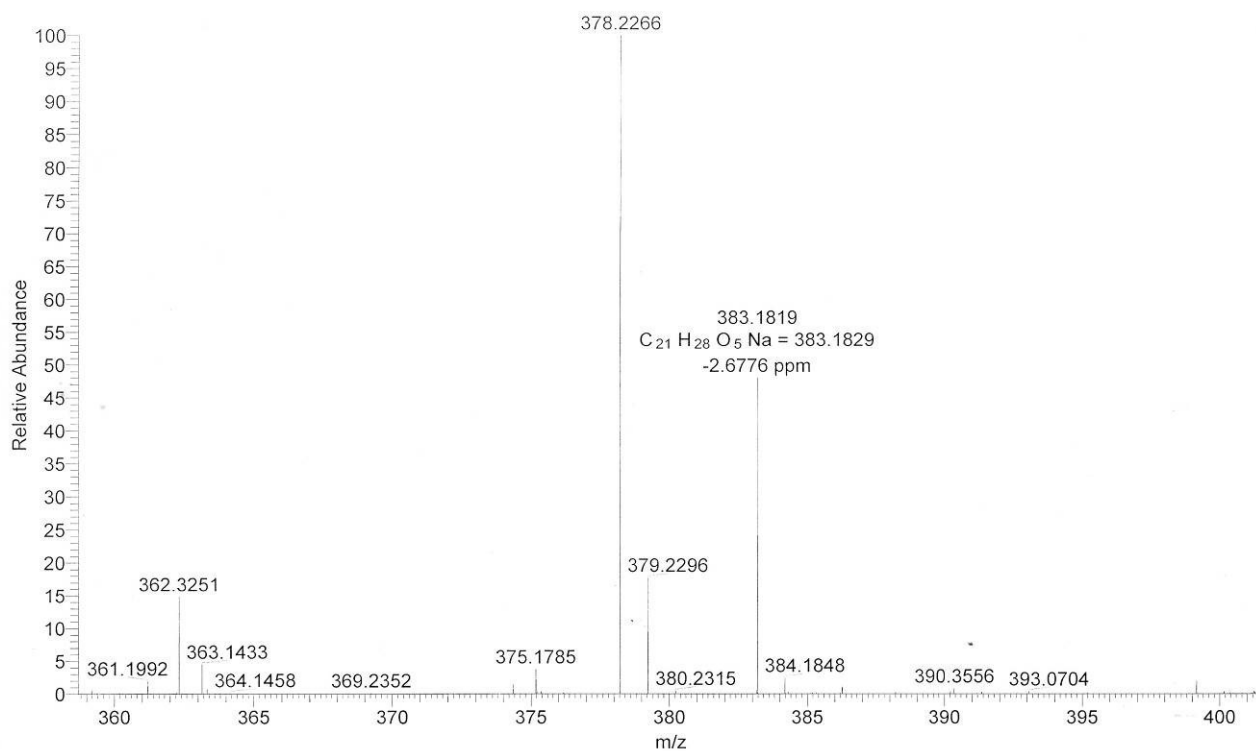

**Figure S23.**  $^1\text{H}$  NMR (500M,  $\text{DMSO-}d_6$ ) spectrum of compound **4**.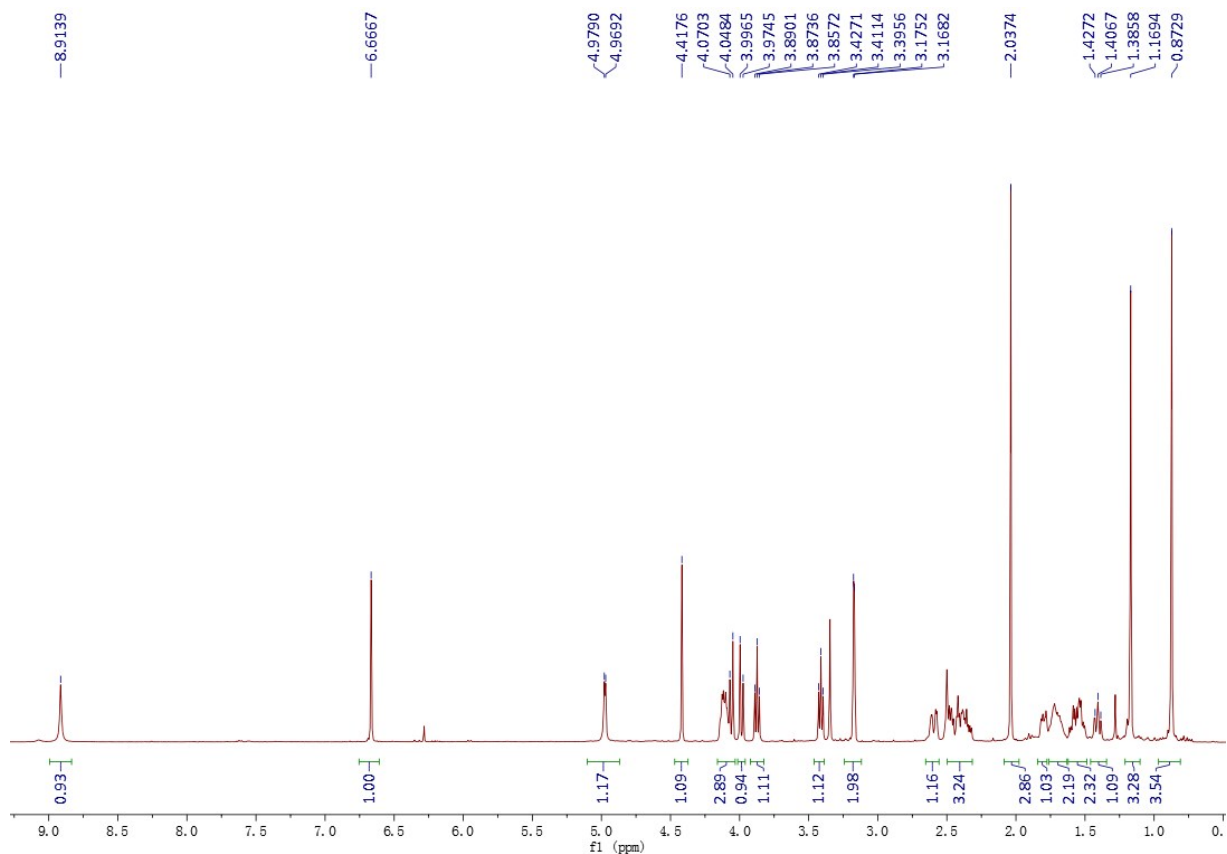**Figure S24.**  $^{13}\text{C}$  NMR (125M,  $\text{DMSO-}d_6$ ) and DEPT spectra of compound **4**.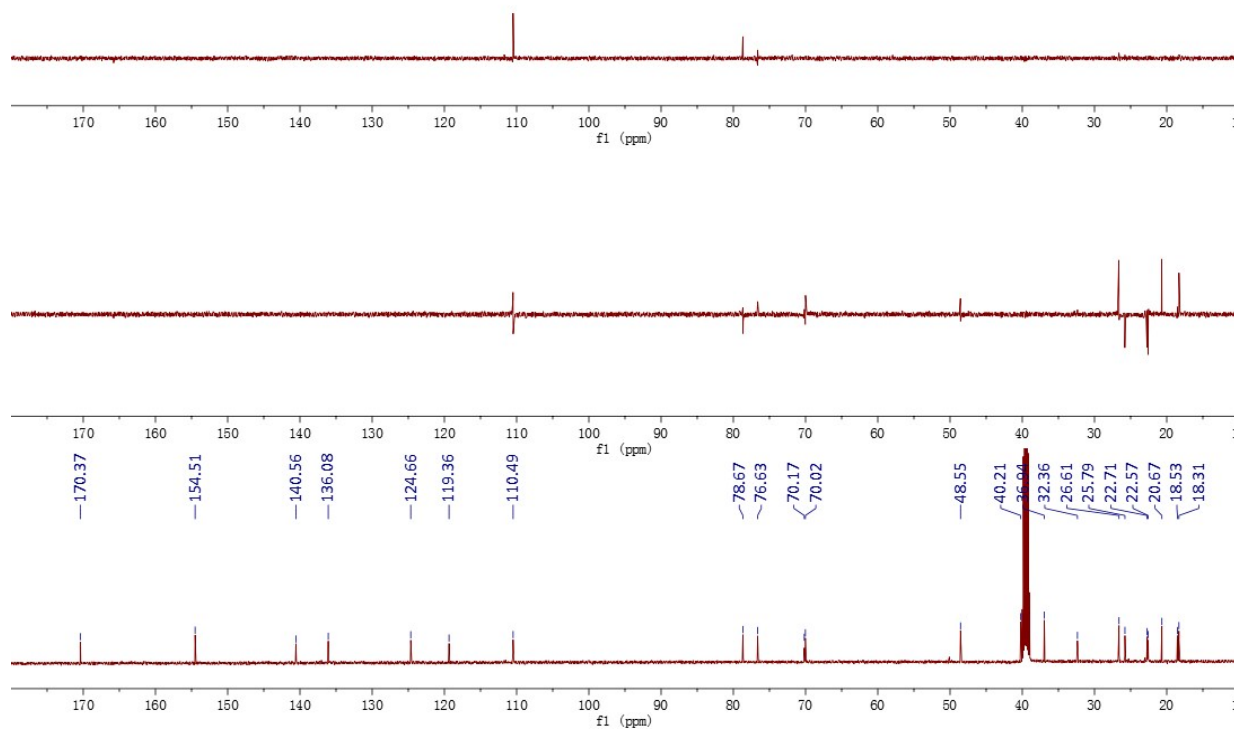

**Figure S25.**  $^1\text{H}$ - $^1\text{H}$  COSY spectrum of compound **4**.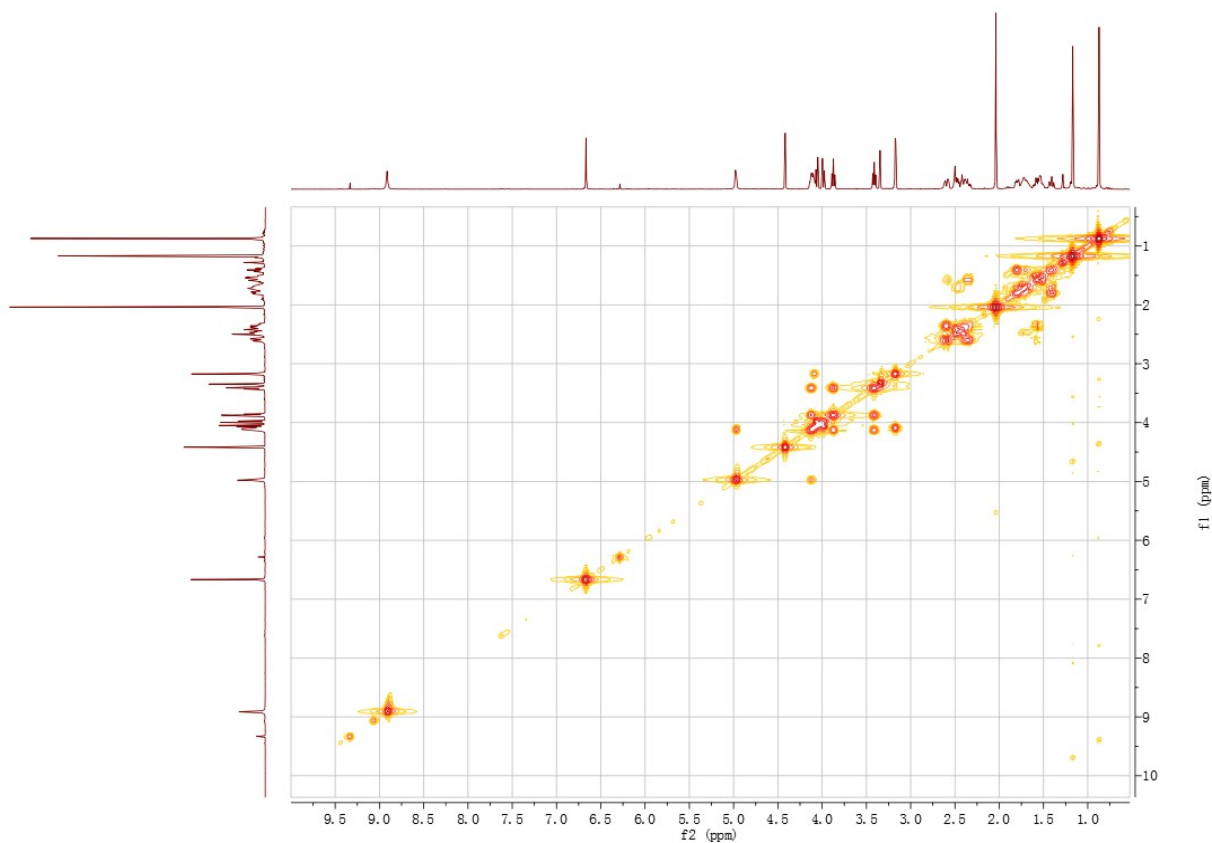**Figure S26.** HSQC spectrum of compound **4**.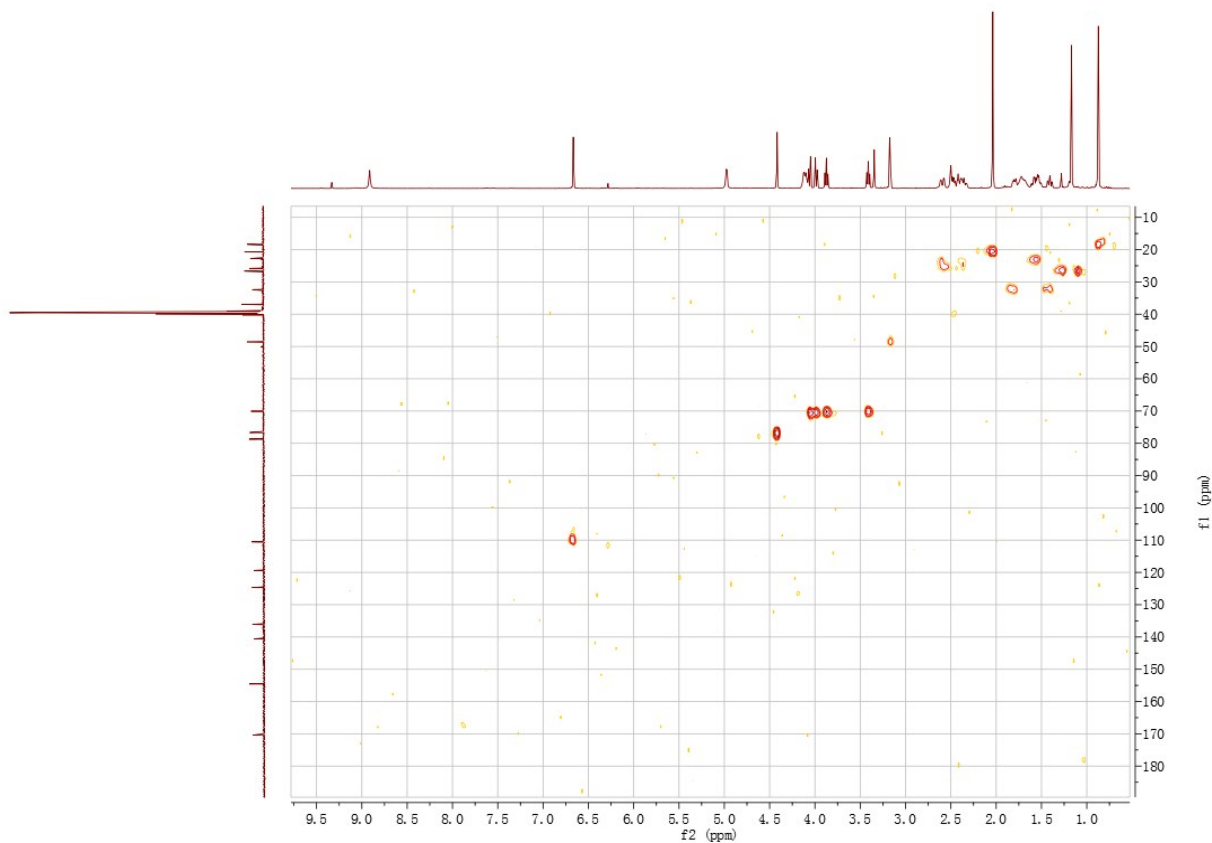

Figure S27. HMBC spectrum of compound 4.

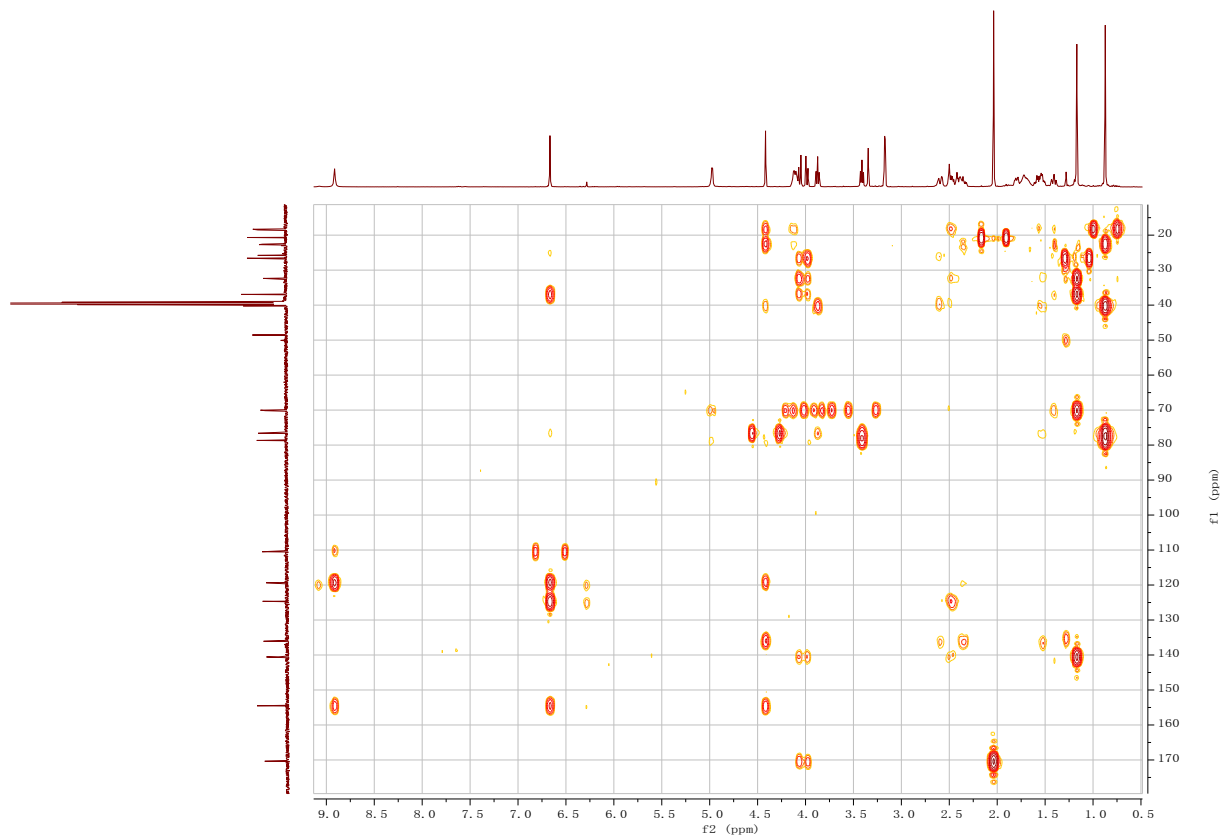

Figure S28. NOESY spectrum of compound 4.

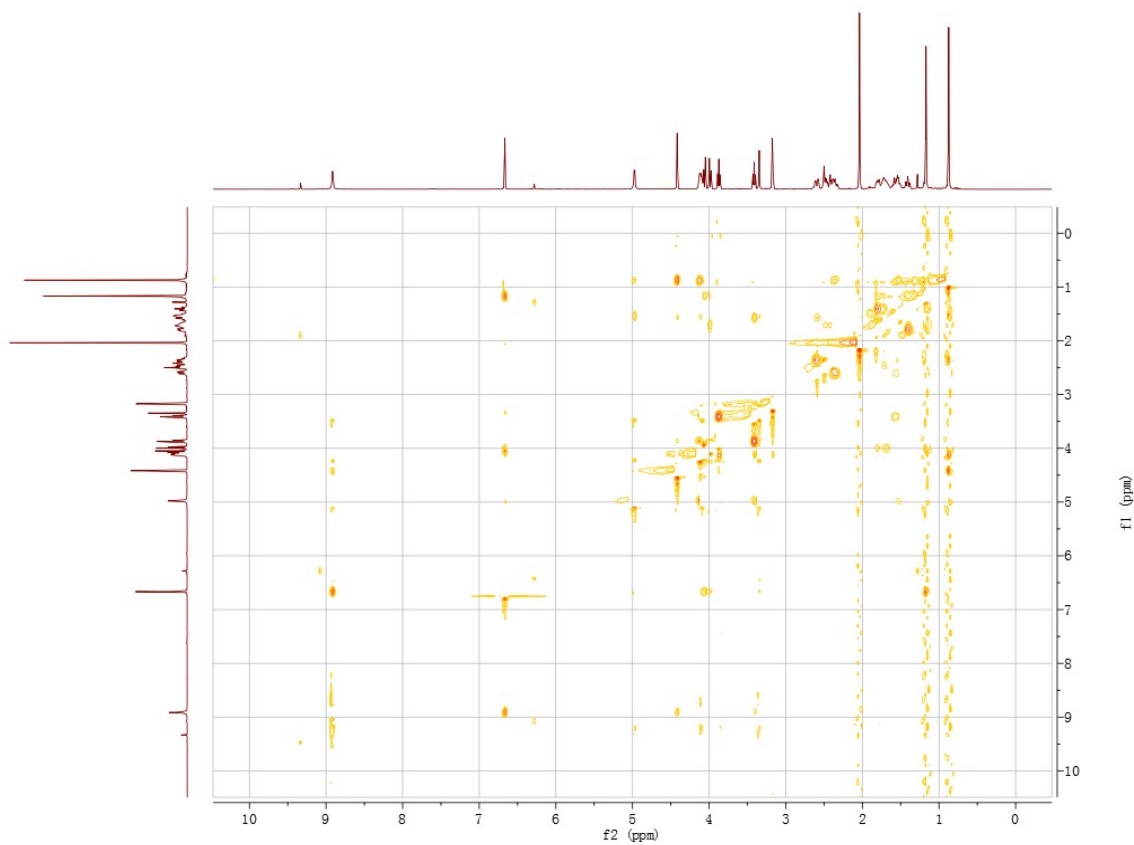

**Figure S29.** HR-ESI-MS spectrum of compound **5**.

20151124-SD310-66\_151124144304 #12 RT: 0.31 AV: 1 NL: 5.88E4  
T: FTMS + p ESI Full ms [100.00-2000.00]

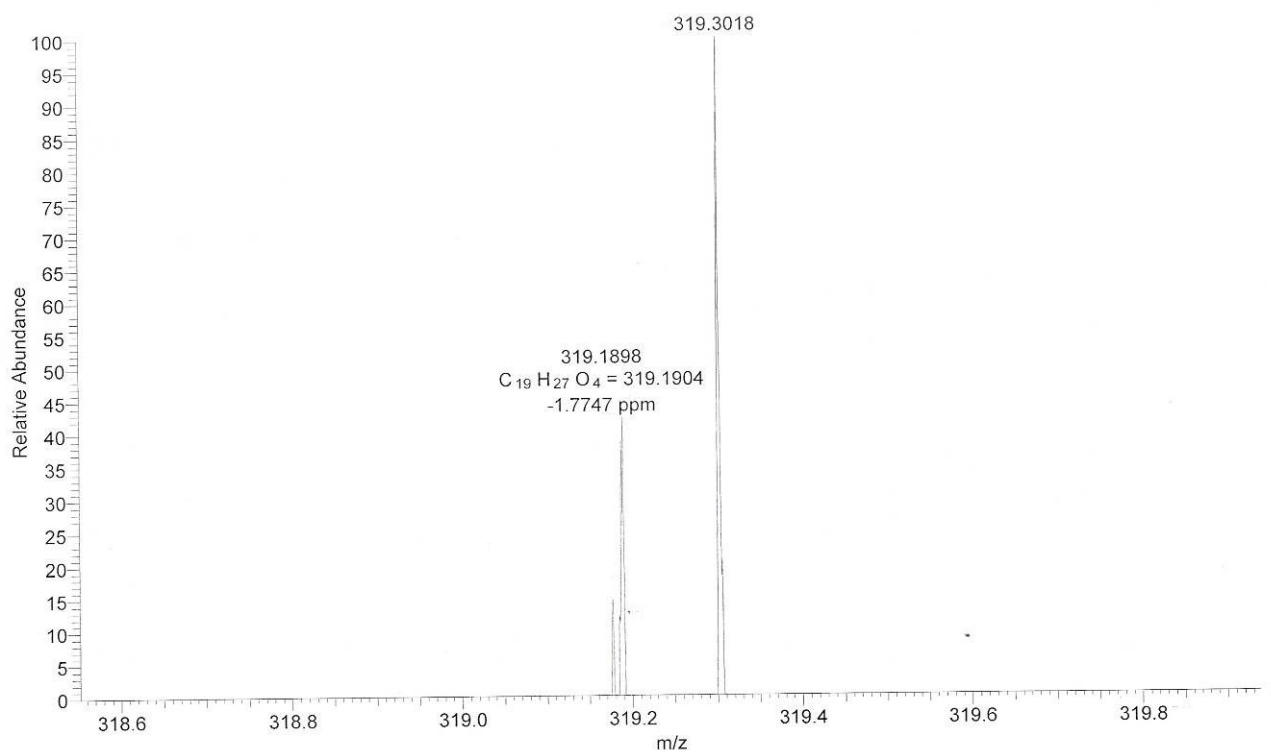**Figure S30.**  $^1H$  NMR (500M, DMSO- $d_6$ ) spectrum of compound **5**.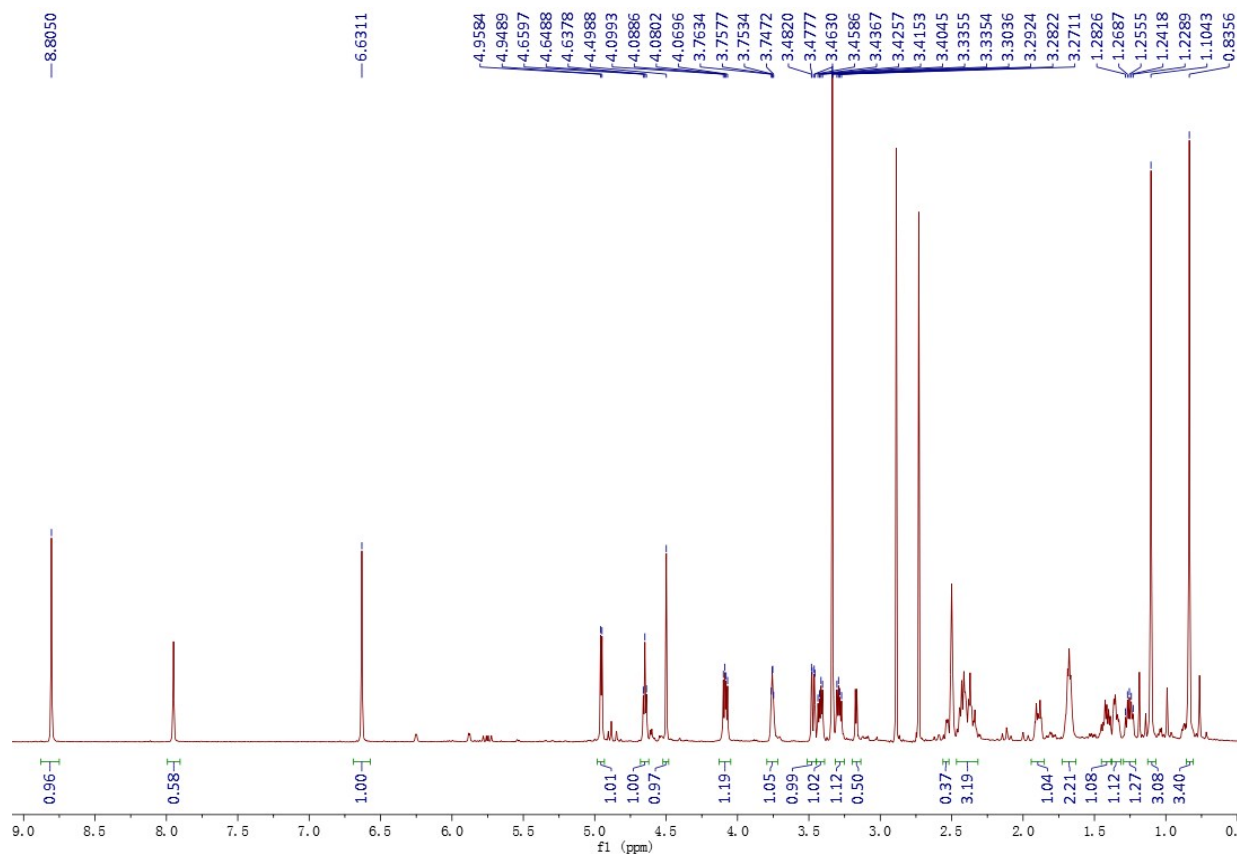



**Figure S31.**  $^{13}\text{C}$  NMR (125M,  $\text{DMSO-}d_6$ ) and DEPT spectra of compound **5**.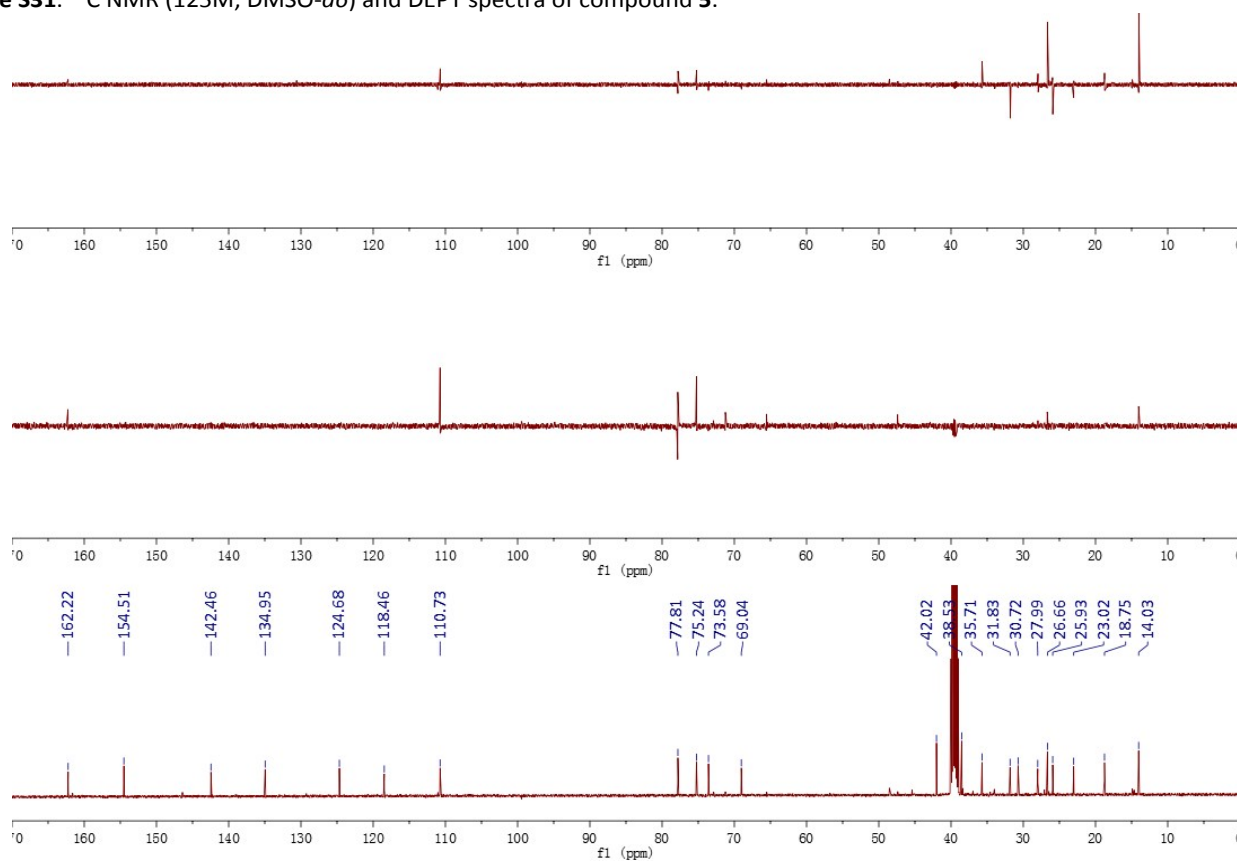**Figure S32.**  $^1\text{H-}^1\text{H}$  COSY spectrum of compound **5**.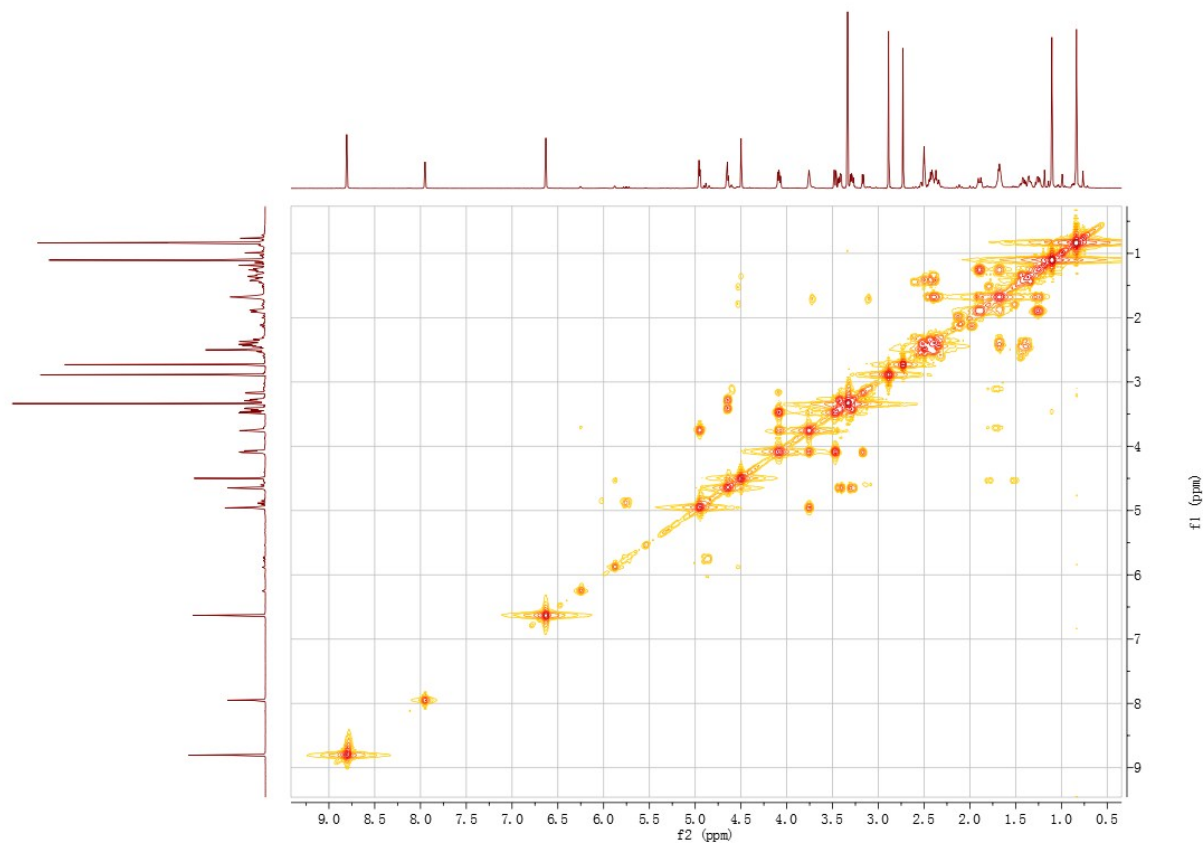

Figure S33. HSQC spectrum of compound 5.

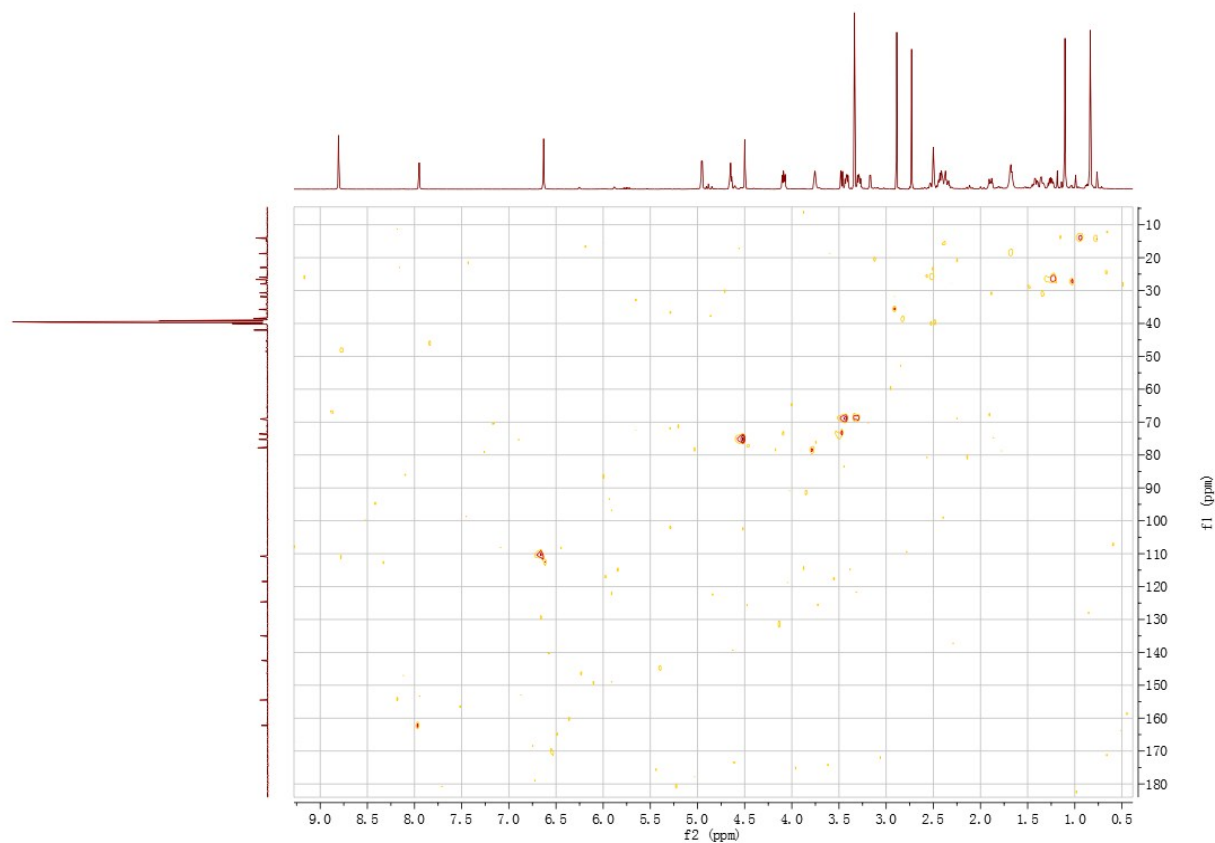

Figure S34. HMBC spectrum of compound 5.

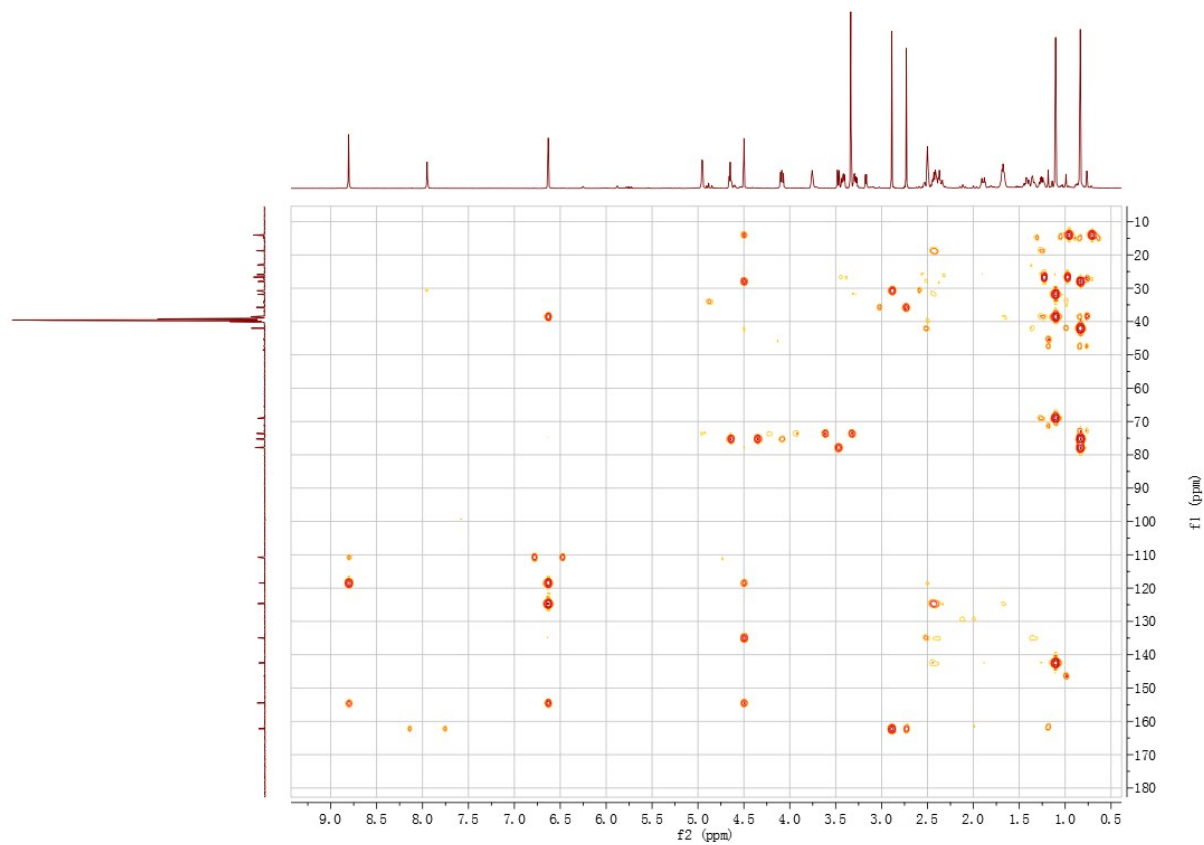

**Figure S35.** NOESY spectrum of compound **5**.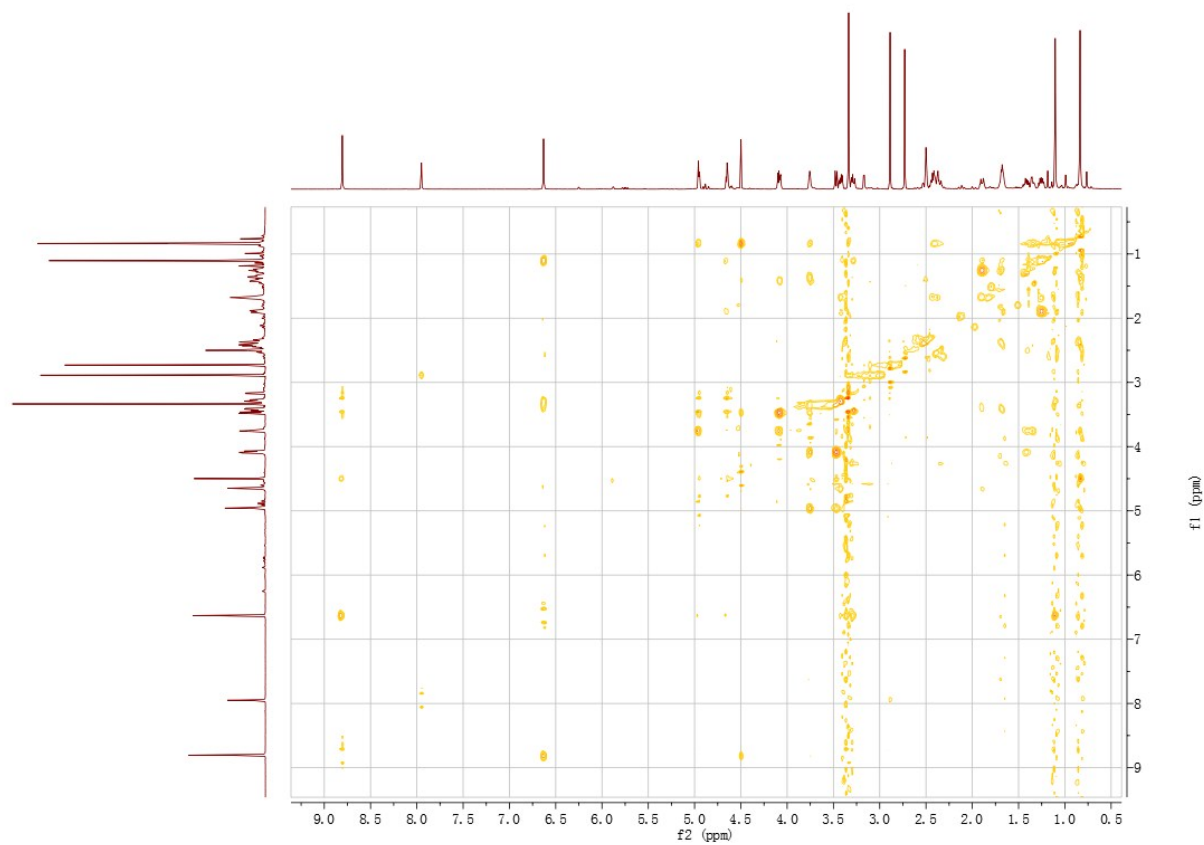

Supplement: c6ra17638k1.pdf [file c6ra17638k1.pdf]
